# Supplementary material for: Rat BodyMap transcriptomes reveal unique circular RNA features across tissue types and developmental stages
Source: PubMed Central journal article supplement (PMC6191709; doi:10.1261/rna.067132.118), 2018-11
Supplement: supp_067132.118_Supplemental_Tables.pdf [file supp_067132.118_Supplemental_Tables.pdf]

**Supplementary Table S1. The host genes of the age-dependent circRNAs in brain**

| <b>Ensembl ID</b>  | <b>Gene name</b>                                                 | <b><math>\rho</math></b> |
|--------------------|------------------------------------------------------------------|--------------------------|
| ENSRNOG00000000942 | PAN3 poly(A) specific ribonuclease subunit(Pan3)                 | 0.845                    |
| ENSRNOG00000001283 | anaphase promoting complex subunit 7(Anapc7)                     | 0.760                    |
| ENSRNOG00000002075 | CCR4-NOT transcription complex, subunit 6-like(Cnot6l)           | 0.753                    |
| ENSRNOG00000002214 | kelch-like family member 8(Klhl8)                                | 0.823                    |
| ENSRNOG00000002983 | nuclear factor 1 X(Nf1x)                                         | 0.817                    |
| ENSRNOG00000003399 | heterogeneous nuclear ribonucleoprotein H1(Hnmp1)                | 0.736                    |
| ENSRNOG00000003882 | centrosomal protein 350(Cep350)                                  | 0.884                    |
| ENSRNOG00000004050 | SNF related kinase(Snrk)                                         | 0.842                    |
| ENSRNOG00000004736 | Ral GEF with PH domain and SH3 binding motif 2(Ralgps2)          | 0.736                    |
| ENSRNOG00000004823 | dedicator of cytokinesis 4(Dock4)                                | 0.718                    |
| ENSRNOG00000005291 | solute carrier family 38, member 1(Slc38a1)                      | 0.708                    |
| ENSRNOG00000005502 | ankyrin repeat and IBR domain containing 1(Ankib1)               | 0.745                    |
| ENSRNOG00000005624 | zinc finger protein X-linked(Zfx)                                | 0.811                    |
| ENSRNOG00000006841 | anoctamin 4(Ano4)                                                | 0.763                    |
| ENSRNOG00000009974 | coenzyme Q3 methyltransferase(Coq3)                              | 0.734                    |
| ENSRNOG00000010150 | spermatid perinuclear RNA binding protein(Strbp)                 | 0.745                    |
| ENSRNOG00000010489 | sterile alpha motif domain containing 4A(Samd4a)                 | 0.727                    |
| ENSRNOG00000010637 | TBC1 domain family, member 5(Tbc1d5)                             | 0.817                    |
| ENSRNOG00000010815 | E74-like factor 2(Elf2)                                          | 0.827                    |
| ENSRNOG00000011000 | regulating synaptic membrane exocytosis 1(Rims1)                 | 0.720                    |
| ENSRNOG00000011063 | DENN domain containing 1B(Dennd1b)                               | 0.745                    |
| ENSRNOG00000011278 | serine/threonine kinase 3(Stk3)                                  | 0.839                    |
| ENSRNOG00000011358 | homeodomain interacting protein kinase 3(Hipk3)                  | 0.784                    |
| ENSRNOG00000011420 | myotubularin related protein 7(Mtmr7)                            | 0.751                    |
| ENSRNOG00000011914 | dystrobrevin, beta(Dtnb)                                         | 0.811                    |
| ENSRNOG00000012653 | protein phosphatase 1, regulatory subunit 13B(Ppp1r13b)          | 0.815                    |
| ENSRNOG00000012899 | RB binding protein 8, endonuclease(Rbbp8)                        | 0.729                    |
| ENSRNOG00000014531 | HBS1-like translational GTPase(Hbs1l)                            | 0.704                    |
| ENSRNOG00000015189 | Bardet-Biedl syndrome 9(Bbs9)                                    | 0.724                    |
| ENSRNOG00000016206 | UV radiation resistance associated(Uvrag)                        | 0.866                    |
| ENSRNOG00000016213 | single-stranded DNA binding protein 2(Ssbp2)                     | 0.757                    |
| ENSRNOG00000017940 | arginine-glutamic acid dipeptide repeats(Rere)                   | 0.811                    |
| ENSRNOG00000018674 | neurotrophic receptor tyrosine kinase 3(Ntrk3)                   | 0.802                    |
| ENSRNOG00000019476 | ArfGAP with GTPase domain, ankyrin repeat and PH domain 1(Agap1) | 0.733                    |
| ENSRNOG00000020386 | ASH1 like histone lysine methyltransferase(Ash1l)                | 0.760                    |
| ENSRNOG00000020689 | cytoplasmic polyadenylation element binding protein 3(Cpeb3)     | 0.730                    |
| ENSRNOG00000020769 | CREB3 regulatory factor(Crebrf)                                  | 0.860                    |
| ENSRNOG00000021468 | glutamate metabotropic receptor 8(Grm8)                          | 0.821                    |
| ENSRNOG00000021569 | T-cell lymphoma invasion and metastasis 1(Tiam1)                 | 0.758                    |
| ENSRNOG00000021581 | Rap guanine nucleotide exchange factor 2(Rapgef2)                | 0.851                    |

| <b>Ensembl ID</b>  | <b>Gene name</b>                                                    | <b><math>\rho</math></b> |
|--------------------|---------------------------------------------------------------------|--------------------------|
| ENSRNOG00000023679 | PR/SET domain 5(Prdm5)                                              | 0.799                    |
| ENSRNOG00000024808 | serine threonine kinase 39(Stk39)                                   | 0.790                    |
| ENSRNOG00000024870 | ankyrin repeat and sterile alpha motif domain containing 1B(Anks1b) | 0.714                    |
| ENSRNOG00000026942 | similar to KIAA2026 protein(RGD1311595)                             | 0.796                    |
| ENSRNOG00000030213 | vacuolar protein sorting 13C(Vps13c)                                | 0.726                    |
| ENSRNOG00000032215 | chromodomain Y-like(Cdyl)                                           | 0.839                    |
| ENSRNOG00000045605 | UDP-glucuronate decarboxylase 1(Uxs1)                               | 0.739                    |
| ENSRNOG00000046139 | synaptotagmin 14(Syt14)                                             | 0.739                    |
| ENSRNOG00000051204 | dopey family member 2(Dopey2)                                       | 0.832                    |
| ENSRNOG00000052721 | lysine (K)-specific demethylase 6A(NEWGENE_1565481)                 | 0.729                    |
| ENSRNOG00000054514 | muskelin 1(Mkln1)                                                   | 0.754                    |
| ENSRNOG00000057042 | propionyl-CoA carboxylase alpha subunit(Pcca)                       | 0.754                    |
| ENSRNOG00000060367 | regulatory factor X, 7(Rfx7)                                        | 0.745                    |

Note – The  $\rho$  values were calculated with *Spearman's* rank correlation test. Only the circRNAs with  $\rho > 0.7$  were listed.

**Supplementary Table S2. The host genes of the age-dependent circRNAs in testes**

| Age           | Ensembl ID         | Gene name                                                                       | $\rho$ |
|---------------|--------------------|---------------------------------------------------------------------------------|--------|
| 2- to 21-week | ENSRNOG00000000262 | zinc finger protein 821(Zfp821)                                                 | 0.631  |
| 2- to 21-week | ENSRNOG00000000327 | HECT domain and ankyrin repeat containing, E3 ubiquitin protein ligase 1(Hace1) | 0.674  |
| 2- to 21-week | ENSRNOG00000000542 | dynein, axonemal, heavy chain 8(Dnah8)                                          | 0.824  |
| 2- to 21-week | ENSRNOG00000000802 | TBC1 domain family, member 32(Tbc1d32)                                          | 0.798  |
| 2- to 21-week | ENSRNOG00000001971 | BBX, HMG-box containing(Bbx)                                                    | 0.622  |
| 2- to 21-week | ENSRNOG00000002142 | CDP-diacylglycerol synthase 1(Cds1)                                             | 0.725  |
| 2- to 21-week | ENSRNOG00000002204 | coiled-coil domain containing 158(Ccdc158)                                      | 0.699  |
| 2- to 21-week | ENSRNOG00000002504 | spermatogenesis associated 17(Spata17)                                          | 0.651  |
| 2- to 21-week | ENSRNOG00000002512 | G patch domain containing 2(Gpatch2)                                            | 0.710  |
| 2- to 21-week | ENSRNOG00000002516 | myotubularin 1(Mtm1)                                                            | 0.963  |
| 2- to 21-week | ENSRNOG00000002544 | kinesin-associated protein 3(Kifap3)                                            | 0.773  |
| 2- to 21-week | ENSRNOG00000002736 | RAB GTPase activating protein 1-like(Rabgap11)                                  | 0.797  |
| 2- to 21-week | ENSRNOG00000002755 | platelet-activating factor acetylhydrolase 1b, regulatory subunit 1(Pafah1b1)   | 0.655  |
| 2- to 21-week | ENSRNOG00000002882 | zinc finger CCHC-type containing 2(Zcchc2)                                      | 0.631  |
| 2- to 21-week | ENSRNOG00000003078 | DDB1 and CUL4 associated factor 6(Dcaf6)                                        | 0.621  |
| 2- to 21-week | ENSRNOG00000003123 | replication protein A1(Rpa1)                                                    | 0.699  |
| 2- to 21-week | ENSRNOG00000003186 | ankyrin repeat and sterile alpha motif domain containing 3(Anks3)               | 0.694  |
| 2- to 21-week | ENSRNOG00000003258 | cell division cycle 73(Cdc73)                                                   | 0.783  |
| 2- to 21-week | ENSRNOG00000003273 | spermatogenesis associated 20(Spata20)                                          | 0.889  |
| 2- to 21-week | ENSRNOG00000003695 | MGAT4 family, member D(Mgat4d)                                                  | 0.726  |
| 2- to 21-week | ENSRNOG00000003908 | centrosomal protein 128(Cep128)                                                 | 0.769  |
| 2- to 21-week | ENSRNOG00000003955 | spermatogenesis associated 7(Spata7)                                            | 0.699  |
| 2- to 21-week | ENSRNOG00000003991 | ankyrin and armadillo repeat containing(Ankar)                                  | 0.873  |
| 2- to 21-week | ENSRNOG00000004076 | PMS1 homolog 1, mismatch repair system component(Pms1)                          | 0.616  |
| 2- to 21-week | ENSRNOG00000004201 | regulating synaptic membrane exocytosis 2(Rims2)                                | 0.903  |
| 2- to 21-week | ENSRNOG00000004290 | growth factor receptor bound protein 10(Grb10)                                  | 0.694  |
| 2- to 21-week | ENSRNOG00000004448 | acyl-CoA synthetase short-chain family member 3(Acss3)                          | 0.699  |
| 2- to 21-week | ENSRNOG00000004456 | clathrin heavy chain linker domain containing 1(Clhc1)                          | 0.686  |
| 2- to 21-week | ENSRNOG00000004564 | leucine-rich repeats and IQ motif containing 1(Lrriq1)                          | 0.783  |
| 2- to 21-week | ENSRNOG00000005042 | RAN binding protein 17(Ranbp17)                                                 | 0.798  |
| 2- to 21-week | ENSRNOG00000005101 | cutaneous T-cell lymphoma-associated antigen 5 homolog(LOC100912115)            | 0.686  |
| 2- to 21-week | ENSRNOG00000005105 | Sad1 and UNC84 domain containing 3(Sun3)                                        | 0.651  |
| 2- to 21-week | ENSRNOG00000005233 | leucine rich repeat containing 6(Lrrc6)                                         | 0.694  |
| 2- to 21-week | ENSRNOG00000005883 | NIMA-related kinase 10(Nek10)                                                   | 0.686  |
| 2- to 21-week | ENSRNOG00000005907 | RAD18 E3 ubiquitin protein ligase(Rad18)                                        | 0.798  |
| 2- to 21-week | ENSRNOG00000005916 | protein phosphatase, Mg <sup>2+</sup> /Mn <sup>2+</sup> dependent, 1A(Ppm1a)    | 0.710  |
| 2- to 21-week | ENSRNOG00000005934 | muscular LMNA-interacting protein(Mlip)                                         | 0.857  |
| 2- to 21-week | ENSRNOG00000006114 | cilia and flagella associated protein 69(Cfap69)                                | 0.626  |
| 2- to 21-week | ENSRNOG00000006248 | tripartite motif-containing 37(Trim37)                                          | 0.873  |

| Age           | Ensembl ID         | Gene name                                                          | $\rho$ |
|---------------|--------------------|--------------------------------------------------------------------|--------|
| 2- to 21-week | ENSRNOG00000006304 | MDM2 proto-oncogene(Mdm2)                                          | 0.679  |
| 2- to 21-week | ENSRNOG00000006340 | mediator of cell motility 1(Memo1)                                 | 0.770  |
| 2- to 21-week | ENSRNOG00000006785 | DDB1 and CUL4 associated factor 8(Dcaf8)                           | 0.725  |
| 2- to 21-week | ENSRNOG00000006832 | zinc finger, DHHC-type containing 5(Zdhhc5)                        | 0.725  |
| 2- to 21-week | ENSRNOG00000007034 | homeodomain interacting protein kinase 2(Hipk2)                    | 0.699  |
| 2- to 21-week | ENSRNOG00000007127 | Bardet-Biedl syndrome 5(Bbs5)                                      | 0.602  |
| 2- to 21-week | ENSRNOG00000007341 | maestro heat-like repeat family member 8(Mroh8)                    | 0.686  |
| 2- to 21-week | ENSRNOG00000007523 | chaperonin containing TCP1 subunit 6B(Cct6b)                       | 0.692  |
| 2- to 21-week | ENSRNOG00000007730 | vomer nasal 2 receptor, 53(Vom2r53)                                | 0.844  |
| 2- to 21-week | ENSRNOG00000008039 | cullin 5(Cul5)                                                     | 0.651  |
| 2- to 21-week | ENSRNOG00000008053 | ATPase phospholipid transporting 8A2(Atp8a2)                       | 0.920  |
| 2- to 21-week | ENSRNOG00000008393 | Tax1 binding protein 1(Tax1bp1)                                    | 0.873  |
| 2- to 21-week | ENSRNOG00000008775 | leucine-rich repeats and guanylate kinase domain containing(Lrguk) | 0.736  |
| 2- to 21-week | ENSRNOG00000008859 | TRAF family member-associated NFKB activator(Tank)                 | 0.834  |
| 2- to 21-week | ENSRNOG00000009208 | progesterone immunomodulatory binding factor 1(Pibf1)              | 0.791  |
| 2- to 21-week | ENSRNOG00000009264 | ELKS/RAB6-interacting/CAST family member 1(Erc1)                   | 0.681  |
| 2- to 21-week | ENSRNOG00000009338 | KRAS proto-oncogene, GTPase(Kras)                                  | 0.920  |
| 2- to 21-week | ENSRNOG00000009555 | leucine-rich repeats and IQ motif containing 3(Lrriq3)             | 0.674  |
| 2- to 21-week | ENSRNOG00000009664 | ankyrin repeat domain 42(Ankrd42)                                  | 0.873  |
| 2- to 21-week | ENSRNOG00000009696 | MDM4, p53 regulator(Mdm4)                                          | 0.699  |
| 2- to 21-week | ENSRNOG00000009745 | protein phosphatase 3 catalytic subunit gamma(Ppp3cc)              | 0.681  |
| 2- to 21-week | ENSRNOG00000009766 | G protein-coupled receptor 180(Gpr180)                             | 0.699  |
| 2- to 21-week | ENSRNOG00000009792 | zinc finger, B-box domain containing(Zbbx)                         | 0.757  |
| 2- to 21-week | ENSRNOG00000009808 | intraflagellar transport 80(Ift80)                                 | 0.767  |
| 2- to 21-week | ENSRNOG00000009851 | solute carrier family 38, member 9(Slc38a9)                        | 0.889  |
| 2- to 21-week | ENSRNOG00000010024 | cytochrome b5 reductase 4(Cyb5r4)                                  | 0.625  |
| 2- to 21-week | ENSRNOG00000010027 | ATR serine/threonine kinase(Atr)                                   | 0.631  |
| 2- to 21-week | ENSRNOG00000010150 | spermatid perinuclear RNA binding protein(Strbp)                   | 0.650  |
| 2- to 21-week | ENSRNOG00000010155 | pericentriolar material 1(Pcm1)                                    | 0.632  |
| 2- to 21-week | ENSRNOG00000010418 | NIMA-related kinase 1(Nek1)                                        | 0.804  |
| 2- to 21-week | ENSRNOG00000010526 | DENN domain containing 1A(Dennd1a)                                 | 0.828  |
| 2- to 21-week | ENSRNOG00000010536 | nuclear receptor subfamily 2, group C, member 2(Nr2c2)             | 0.651  |
| 2- to 21-week | ENSRNOG00000010637 | TBC1 domain family, member 5(Tbc1d5)                               | 0.887  |
| 2- to 21-week | ENSRNOG00000010815 | E74-like factor 2(Elf2)                                            | 0.744  |
| 2- to 21-week | ENSRNOG00000010819 | heat shock protein 4-like(Hspa4l)                                  | 0.694  |
| 2- to 21-week | ENSRNOG00000010952 | intraflagellar transport 122(Ift122)                               | 0.699  |
| 2- to 21-week | ENSRNOG00000011000 | regulating synaptic membrane exocytosis 1(Rims1)                   | 0.946  |
| 2- to 21-week | ENSRNOG00000011059 | tau tubulin kinase 2(Ttbk2)                                        | 0.655  |
| 2- to 21-week | ENSRNOG00000011066 | membrane associated ring-CH-type finger 6(March6)                  | 0.791  |
| 2- to 21-week | ENSRNOG00000011094 | EF-hand calcium binding domain 6(Efcab6)                           | 0.686  |
| 2- to 21-week | ENSRNOG00000011376 | basal body orientation factor 1(Bbof1)                             | 0.616  |

| Age           | Ensembl ID         | Gene name                                                                   | $\rho$ |
|---------------|--------------------|-----------------------------------------------------------------------------|--------|
| 2- to 21-week | ENSRNOG00000011382 | WD repeat domain 33(Wdr33)                                                  | 0.659  |
| 2- to 21-week | ENSRNOG00000011417 | phosphodiesterase 3B(Pde3b)                                                 | 0.710  |
| 2- to 21-week | ENSRNOG00000011603 | calcium binding protein 39-like(Cab39l)                                     | 0.686  |
| 2- to 21-week | ENSRNOG00000011627 | zinc finger RNA binding protein(Zfr)                                        | 0.644  |
| 2- to 21-week | ENSRNOG00000011669 | glutathione S-transferase, C-terminal domain containing(Gstcd)              | 0.857  |
| 2- to 21-week | ENSRNOG00000011791 | zinc finger AN1-type containing 4(Zfand4)                                   | 0.829  |
| 2- to 21-week | ENSRNOG00000011847 | G protein-coupled receptor kinase 4(Grk4)                                   | 0.804  |
| 2- to 21-week | ENSRNOG00000012015 | leucine rich repeat containing 49(Lrrc49)                                   | 0.616  |
| 2- to 21-week | ENSRNOG00000012055 | mannosidase, alpha, class 2A, member 2(Man2a2)                              | 0.722  |
| 2- to 21-week | ENSRNOG00000012536 | sphingomyelin synthase 1(Sgms1)                                             | 0.744  |
| 2- to 21-week | ENSRNOG00000012637 | amyotrophic lateral sclerosis 2 chromosome region, candidate 11(Als2cr11)   | 0.699  |
| 2- to 21-week | ENSRNOG00000012806 | RB binding protein 6, ubiquitin ligase(Rbbp6)                               | 0.631  |
| 2- to 21-week | ENSRNOG00000013293 | methylcrotonoyl-CoA carboxylase 1(Mccc1)                                    | 0.699  |
| 2- to 21-week | ENSRNOG00000013318 | coiled-coil domain containing 150(Ccdc150)                                  | 0.692  |
| 2- to 21-week | ENSRNOG00000013673 | mutS homolog 3(Msh3)                                                        | 0.705  |
| 2- to 21-week | ENSRNOG00000013876 | mitochondrial intermediate peptidase(Mipep)                                 | 0.651  |
| 2- to 21-week | ENSRNOG00000013884 | pleckstrin and Sec7 domain containing 3(Psd3)                               | 0.798  |
| 2- to 21-week | ENSRNOG00000013962 | membrane associated guanylate kinase, WW and PDZ domain containing 2(Magi2) | 0.615  |
| 2- to 21-week | ENSRNOG00000014139 | sodium channel and clathrin linker 1(Sclt1)                                 | 0.710  |
| 2- to 21-week | ENSRNOG00000014163 | zinc finger protein 536(Zfp536)                                             | 0.699  |
| 2- to 21-week | ENSRNOG00000014276 | phospholipase C, epsilon 1(Plce1)                                           | 0.686  |
| 2- to 21-week | ENSRNOG00000014486 | regulatory factor X3(Rfx3)                                                  | 0.828  |
| 2- to 21-week | ENSRNOG00000014576 | dedicator of cyto-kinesis 3(Dock3)                                          | 0.887  |
| 2- to 21-week | ENSRNOG00000014584 | outer dense fiber of sperm tails 2(Odf2)                                    | 0.659  |
| 2- to 21-week | ENSRNOG00000014590 | serine/threonine kinase 33(Stk33)                                           | 0.699  |
| 2- to 21-week | ENSRNOG00000014775 | nucleolar protein 4(Nol4)                                                   | 0.844  |
| 2- to 21-week | ENSRNOG00000014875 | ASH2 like histone lysine methyltransferase complex subunit(Ash2l)           | 0.705  |
| 2- to 21-week | ENSRNOG00000015162 | lon peptidase 2, peroxisomal(Lonp2)                                         | 0.699  |
| 2- to 21-week | ENSRNOG00000015189 | Bardet-Biedl syndrome 9(Bbs9)                                               | 0.917  |
| 2- to 21-week | ENSRNOG00000015357 | BMP-binding endothelial regulator(Bmper)                                    | 0.647  |
| 2- to 21-week | ENSRNOG00000015519 | carboxylesterase 1D(Ces1d)                                                  | 0.946  |
| 2- to 21-week | ENSRNOG00000015734 | ubiquitin protein ligase E3A(Ube3a)                                         | 0.681  |
| 2- to 21-week | ENSRNOG00000015898 | FER tyrosine kinase(Fer)                                                    | 0.821  |
| 2- to 21-week | ENSRNOG00000016183 | intracisternal A particle-promoted polypeptide(Ipp)                         | 0.844  |
| 2- to 21-week | ENSRNOG00000016360 | G protein pathway suppressor 2(Gps2)                                        | 0.857  |
| 2- to 21-week | ENSRNOG00000016545 | intraflagellar transport 140(Ift140)                                        | 0.699  |
| 2- to 21-week | ENSRNOG00000016620 | casein kinase 1, gamma 1(Csnk1g1)                                           | 0.742  |
| 2- to 21-week | ENSRNOG00000016635 | similar to K04F10.2(LOC361646)                                              | 0.699  |
| 2- to 21-week | ENSRNOG00000016703 | general transcription factor 2A subunit 1 like(Gtf2a1l)                     | 0.647  |
| 2- to 21-week | ENSRNOG00000016717 | growth arrest-specific 2(Gas2)                                              | 0.707  |
| 2- to 21-week | ENSRNOG00000016910 | Ral GEF with PH domain and SH3 binding motif 1(Ralgps1)                     | 0.715  |

| Age           | Ensembl ID         | Gene name                                                    | $\rho$ |
|---------------|--------------------|--------------------------------------------------------------|--------|
| 2- to 21-week | ENSRNOG00000016963 | thyroid hormone receptor interactor 12(Trip12)               | 0.705  |
| 2- to 21-week | ENSRNOG00000016992 | POTE ankyrin domain family, member C(Potec)                  | 0.663  |
| 2- to 21-week | ENSRNOG00000017074 | RAB28, member RAS oncogene family(Rab28)                     | 0.692  |
| 2- to 21-week | ENSRNOG00000017178 | Hydin, axonemal central pair apparatus protein(Hydin)        | 0.828  |
| 2- to 21-week | ENSRNOG00000017282 | testis-specific kinase 2(Tesk2)                              | 0.852  |
| 2- to 21-week | ENSRNOG00000017518 | ADAM metallopeptidase domain 5(Adam5)                        | 0.789  |
| 2- to 21-week | ENSRNOG00000017554 | ADAM metallopeptidase domain 3A(Adam3a)                      | 0.844  |
| 2- to 21-week | ENSRNOG00000017581 | similar to 4833420G17Rik protein(RGD1306227)                 | 0.616  |
| 2- to 21-week | ENSRNOG00000017608 | C2 calcium-dependent domain containing 3(C2cd3)              | 0.679  |
| 2- to 21-week | ENSRNOG00000018345 | ATP binding cassette subfamily E member 1(Abce1)             | 0.686  |
| 2- to 21-week | ENSRNOG00000018381 | CDK5 regulatory subunit associated protein 1-like 1(Cdkal1)  | 0.674  |
| 2- to 21-week | ENSRNOG00000018387 | WD repeat domain 7(Wdr7)                                     | 0.650  |
| 2- to 21-week | ENSRNOG00000018457 | protein phosphatase 2 phosphatase activator(Ptpa)            | 0.699  |
| 2- to 21-week | ENSRNOG00000018529 | casein kinase 1, gamma 2(Csnk1g2)                            | 0.828  |
| 2- to 21-week | ENSRNOG00000018946 | tripartite motif-containing 33(Trim33)                       | 0.685  |
| 2- to 21-week | ENSRNOG00000019271 | unc-51 like kinase 4(Ulk4)                                   | 0.828  |
| 2- to 21-week | ENSRNOG00000019272 | G kinase anchoring protein 1(Gkap1)                          | 0.726  |
| 2- to 21-week | ENSRNOG00000019752 | solute carrier family 29 member 1(Slc29a1)                   | 0.834  |
| 2- to 21-week | ENSRNOG00000019826 | SIL1 nucleotide exchange factor(Sil1)                        | 0.920  |
| 2- to 21-week | ENSRNOG00000020118 | NME/NM23 family member 5(Nme5)                               | 0.889  |
| 2- to 21-week | ENSRNOG00000020191 | TBC1 domain family, member 17(Tbc1d17)                       | 0.651  |
| 2- to 21-week | ENSRNOG00000020203 | protein tyrosine phosphatase, non-receptor type 20(Ptpn20)   | 0.797  |
| 2- to 21-week | ENSRNOG00000020269 | SURP and G patch domain containing 2(Sugp2)                  | 0.824  |
| 2- to 21-week | ENSRNOG00000020344 | syntrophin, beta 2(Sntb2)                                    | 0.791  |
| 2- to 21-week | ENSRNOG00000020347 | nucleoporin 98(Nup98)                                        | 0.685  |
| 2- to 21-week | ENSRNOG00000020500 | CDC-like kinase 2(Clk2)                                      | 0.744  |
| 2- to 21-week | ENSRNOG00000020689 | cytoplasmic polyadenylation element binding protein 3(Cpeb3) | 0.767  |
| 2- to 21-week | ENSRNOG00000020748 | microtubule-associated protein 4(Map4)                       | 0.844  |
| 2- to 21-week | ENSRNOG00000020769 | CREB3 regulatory factor(Crebrf)                              | 0.798  |
| 2- to 21-week | ENSRNOG00000021203 | atlastin GTPase 3(Atl3)                                      | 0.651  |
| 2- to 21-week | ENSRNOG00000021569 | T-cell lymphoma invasion and metastasis 1(Tiam1)             | 0.692  |
| 2- to 21-week | ENSRNOG00000022066 | family with sequence similarity 117, member B(Fam117b)       | 0.686  |
| 2- to 21-week | ENSRNOG00000022343 | ALMS1, centrosome and basal body associated protein(Alms1)   | 0.739  |
| 2- to 21-week | ENSRNOG00000022445 | IQ motif containing F3(Iqcf3)                                | 0.699  |
| 2- to 21-week | ENSRNOG00000022845 | centrosomal protein 70(Cep70)                                | 0.699  |
| 2- to 21-week | ENSRNOG00000023202 | ubiquitin specific peptidase 15(Usp15)                       | 0.933  |
| 2- to 21-week | ENSRNOG00000023566 | von Willebrand factor A domain containing 3B(Vwa3b)          | 0.692  |
| 2- to 21-week | ENSRNOG00000023807 | cyclin Y-like 1(Ccny11)                                      | 0.736  |
| 2- to 21-week | ENSRNOG00000023941 | family with sequence similarity 178, member B(Fam178b)       | 0.725  |
| 2- to 21-week | ENSRNOG00000024272 | INO80 complex subunit D(Ino80d)                              | 0.699  |
| 2- to 21-week | ENSRNOG00000024402 | focadhesin(Focad)                                            | 0.737  |
| 2- to 21-week | ENSRNOG00000024521 | spermatogenesis associated 16(Spata16)                       | 0.699  |

| Age           | Ensembl ID         | Gene name                                                                       | $\rho$ |
|---------------|--------------------|---------------------------------------------------------------------------------|--------|
| 2- to 21-week | ENSRNOG00000024530 | Lyr motif containing 1(Lyrm1)                                                   | 0.679  |
| 2- to 21-week | ENSRNOG00000024563 | glucosidase, alpha; neutral C(Ganc)                                             | 0.857  |
| 2- to 21-week | ENSRNOG00000024632 | activating transcription factor 6(Atf6)                                         | 0.758  |
| 2- to 21-week | ENSRNOG00000024808 | serine threonine kinase 39(Stk39)                                               | 0.650  |
| 2- to 21-week | ENSRNOG00000024837 | transmembrane phosphoinositide 3-phosphatase and tensin homolog 2(Tpte2)        | 0.824  |
| 2- to 21-week | ENSRNOG00000024870 | ankyrin repeat and sterile alpha motif domain containing 1B(Anks1b)             | 0.651  |
| 2- to 21-week | ENSRNOG00000024878 | RNA binding motif protein 44(Rbm44)                                             | 0.797  |
| 2- to 21-week | ENSRNOG00000025141 | kizuna centrosomal protein(Kiz)                                                 | 0.679  |
| 2- to 21-week | ENSRNOG00000025332 | CD109 molecule(Cd109)                                                           | 0.699  |
| 2- to 21-week | ENSRNOG00000025406 | IQ motif containing GTPase activating protein 2(Iqgap2)                         | 0.699  |
| 2- to 21-week | ENSRNOG00000025551 | regulator of G-protein signaling 22(Rgs22)                                      | 0.789  |
| 2- to 21-week | ENSRNOG00000025728 | ADAM metallopeptidase domain 32(Adam32)                                         | 0.821  |
| 2- to 21-week | ENSRNOG00000025787 | sperm associated antigen 6(Spag6)                                               | 0.844  |
| 2- to 21-week | ENSRNOG00000026589 | dpy-19 like 1(Dpy191)                                                           | 0.725  |
| 2- to 21-week | ENSRNOG00000026610 | akirin 1(Akirin1)                                                               | 0.699  |
| 2- to 21-week | ENSRNOG00000026842 | nicotinamide nucleotide transhydrogenase(Nnt)                                   | 0.616  |
| 2- to 21-week | ENSRNOG00000026845 | family with sequence similarity 81, member B(Fam81b)                            | 0.699  |
| 2- to 21-week | ENSRNOG00000027012 | ubiquitin specific peptidase 54(Usp54)                                          | 0.857  |
| 2- to 21-week | ENSRNOG00000027617 | tetratricopeptide repeat domain 26(Ttc26)                                       | 0.705  |
| 2- to 21-week | ENSRNOG00000027801 | zona pellucida binding protein(Zpbp)                                            | 0.711  |
| 2- to 21-week | ENSRNOG00000027992 | DS cell adhesion molecule(Dscam)                                                | 0.699  |
| 2- to 21-week | ENSRNOG00000028501 | zinc finger CCCH-type containing 18(Zc3h18)                                     | 0.699  |
| 2- to 21-week | ENSRNOG00000029773 | ATM serine/threonine kinase(Atm)                                                | 0.674  |
| 2- to 21-week | ENSRNOG00000031038 | glycosyltransferase-like domain containing 1(Gtdc1)                             | 0.757  |
| 2- to 21-week | ENSRNOG00000031247 | leucine, glutamate and lysine rich 1(Lekr1)                                     | 0.884  |
| 2- to 21-week | ENSRNOG00000032570 | structural maintenance of chromosomes 1B(Smc1b)                                 | 0.699  |
| 2- to 21-week | ENSRNOG00000033169 | cytoplasmic polyadenylation element binding protein 4(Cpeb4)                    | 0.699  |
| 2- to 21-week | ENSRNOG00000033528 | tolloid-like 1(Tll1)                                                            | 0.889  |
| 2- to 21-week | ENSRNOG00000036576 | zinc finger, DHHC-type containing 6(Zdhhc6)                                     | 0.705  |
| 2- to 21-week | ENSRNOG00000036675 | BTB domain containing 16(Btbd16)                                                | 0.686  |
| 2- to 21-week | ENSRNOG00000036964 | Ral GTPase activating protein catalytic alpha subunit 2(Ralgapa2)               | 0.774  |
| 2- to 21-week | ENSRNOG00000037865 | HORMA domain containing 2(Hormad2)                                              | 0.631  |
| 2- to 21-week | ENSRNOG00000038242 | similar to T-cell activation Rho GTPase-activating protein isoform b(LOC365791) | 0.783  |
| 2- to 21-week | ENSRNOG00000039300 | adenosylhomocysteinase-like 2(Ahcy12)                                           | 0.679  |
| 2- to 21-week | ENSRNOG00000042068 | OTU deubiquitinase 7B(Otud7b)                                                   | 0.725  |
| 2- to 21-week | ENSRNOG00000042432 | NIMA-related kinase 11(Nek11)                                                   | 0.674  |
| 2- to 21-week | ENSRNOG00000042879 | SEH1-like (S. cerevisiae)(Seh1)                                                 | 0.613  |
| 2- to 21-week | ENSRNOG00000043035 | F-box and leucine-rich repeat protein 13(Fbxl13)                                | 0.626  |
| 2- to 21-week | ENSRNOG00000045585 | dpy-19 like 2(Dpy1912)                                                          | 0.722  |
| 2- to 21-week | ENSRNOG00000046023 | exocyst complex component 4(Exoc4)                                              | 0.677  |
| 2- to 21-week | ENSRNOG00000048719 | dystrobrevin binding protein 1(Dtnbp1)                                          | 0.828  |

| Age             | Ensembl ID         | Gene name                                                           | $\rho$ |
|-----------------|--------------------|---------------------------------------------------------------------|--------|
| 2- to 21-week   | ENSRNOG00000049507 | septin 10(Sept10)                                                   | 0.647  |
| 2- to 21-week   | ENSRNOG00000050191 | coiled-coil domain containing 7(Ccdc7)                              | 0.692  |
| 2- to 21-week   | ENSRNOG00000052688 | dynein, axonemal, heavy chain 2(Dnah2)                              | 0.616  |
| 2- to 21-week   | ENSRNOG00000053060 | zinc finger, C3H1-type containing(Zfc3h1)                           | 0.616  |
| 2- to 21-week   | ENSRNOG00000054331 | WD repeat containing planar cell polarity effector(Wdpcp)           | 0.681  |
| 2- to 21-week   | ENSRNOG00000054901 | replication timing regulatory factor 1(Rif1)                        | 0.699  |
| 2- to 21-week   | ENSRNOG00000056330 | cyclic nucleotide binding domain containing 1(Cnbd1)                | 0.615  |
| 2- to 21-week   | ENSRNOG00000056647 | activating signal cointegrator 1 complex subunit 1(Ascc1)           | 0.651  |
| 2- to 21-week   | ENSRNOG00000056826 | ArfGAP with RhoGAP domain, ankyrin repeat and PH domain 2(Arap2)    | 0.651  |
| 2- to 21-week   | ENSRNOG00000057042 | propionyl-CoA carboxylase alpha subunit(Pcca)                       | 0.621  |
| 2- to 21-week   | ENSRNOG00000057315 | potassium voltage-gated channel subfamily H member 3(Kcnh3)         | 0.632  |
| 2- to 21-week   | ENSRNOG00000057372 | methyltransferase like 6(Mettl6)                                    | 0.857  |
| 2- to 21-week   | ENSRNOG00000057740 | coiled-coil domain containing 148(Ccdc148)                          | 0.843  |
| 2- to 21-week   | ENSRNOG00000057815 | coiled-coil domain containing 191(Ccdc191)                          | 0.774  |
| 2- to 21-week   | ENSRNOG00000057945 | Fanconi anemia, complementation group G(Fancg)                      | 0.710  |
| 2- to 21-week   | ENSRNOG00000058275 | sperm flagellar 2(Spf2)                                             | 0.659  |
| 2- to 21-week   | ENSRNOG00000058805 | axin interactor, dorsalization associated(Aida)                     | 0.659  |
| 2- to 21-week   | ENSRNOG00000059276 | similar to hypothetical protein FLJ10706(LOC498265)                 | 0.844  |
| 2- to 21-week   | ENSRNOG00000059659 | zinc finger AN1-type containing 3(Zfand3)                           | 0.699  |
| 2- to 21-week   | ENSRNOG00000059865 | dynein, axonemal, heavy chain 12(Dnah12)                            | 0.828  |
| 2- to 21-week   | ENSRNOG00000060561 | glycerophosphodiester phosphodiesterase domain containing 1(Gdpd1)  | 0.828  |
| 2- to 21-week   | ENSRNOG00000060984 | dynein, axonemal, heavy chain 7(Dnah7)                              | 0.813  |
| 2- to 21-week   | ENSRNOG00000061040 | HECT and RLD domain containing E3 ubiquitin protein ligase 4(Herc4) | 0.617  |
| 2- to 21-week   | ENSRNOG00000061424 | mitogen activated protein kinase kinase kinase 3(Map3k3)            | 0.616  |
| 2- to 21-week   | ENSRNOG00000061543 | adaptor-related protein complex 2, beta 1 subunit(Ap2b1)            | 0.699  |
| 2- to 21-week   | ENSRNOG00000061795 | RNA binding motif protein 4B(Rbm4b)                                 | 0.644  |
| 21- to 104-week | ENSRNOG00000000042 | xenotropic and polytropic retrovirus receptor 1(Xpr1)               | -0.750 |
| 21- to 104-week | ENSRNOG00000000150 | DnaJ heat shock protein family (Hsp40) member C1(Dnajc1)            | -0.659 |
| 21- to 104-week | ENSRNOG00000000262 | zinc finger protein 821(Zfp821)                                     | -0.930 |
| 21- to 104-week | ENSRNOG00000000303 | centrosomal protein 57-like 1(Cep57l1)                              | -0.750 |
| 21- to 104-week | ENSRNOG00000000540 | BTB domain containing 9(Btbd9)                                      | -0.930 |
| 21- to 104-week | ENSRNOG00000000542 | dynein, axonemal, heavy chain 8(Dnah8)                              | -0.930 |
| 21- to 104-week | ENSRNOG00000000593 | REV3 like, DNA directed polymerase zeta catalytic subunit(Rev3l)    | -0.639 |
| 21- to 104-week | ENSRNOG00000000802 | TBC1 domain family, member 32(Tbc1d32)                              | -0.930 |
| 21- to 104-week | ENSRNOG00000001178 | signal peptide peptidase like 3(Sppl3)                              | -0.750 |
| 21- to 104-week | ENSRNOG00000001294 | intraflagellar transport 81(Ift81)                                  | -0.750 |
| 21- to 104-week | ENSRNOG00000001971 | BBX, HMG-box containing(Bbx)                                        | -0.873 |
| 21- to 104-week | ENSRNOG00000002112 | zinc finger protein 644(Zfp644)                                     | -0.671 |
| 21- to 104-week | ENSRNOG00000002142 | CDP-diacylglycerol synthase 1(Cds1)                                 | -0.930 |
| 21- to 104-week | ENSRNOG00000002176 | nectin cell adhesion molecule 3(Nectin3)                            | -0.639 |
| 21- to 104-week | ENSRNOG00000002204 | coiled-coil domain containing 158(Ccdc158)                          | -0.750 |



| Age             | Ensembl ID         | Gene name                                                                     | $\rho$ |
|-----------------|--------------------|-------------------------------------------------------------------------------|--------|
| 21- to 104-week | ENSRNOG00000002275 | factor interacting with PAPOLA and CPSF1(Fip111)                              | -0.750 |
| 21- to 104-week | ENSRNOG00000002496 | syntaxin binding protein 5-like(Stxbp51)                                      | -0.930 |
| 21- to 104-week | ENSRNOG00000002504 | spermatogenesis associated 17(Spata17)                                        | -0.750 |
| 21- to 104-week | ENSRNOG00000002516 | myotubularin 1(Mtm1)                                                          | -0.894 |
| 21- to 104-week | ENSRNOG00000002532 | protamine 1(Prm1)                                                             | -0.750 |
| 21- to 104-week | ENSRNOG00000002538 | erythrocyte membrane protein band 4.1 like 5(Epb4115)                         | -0.930 |
| 21- to 104-week | ENSRNOG00000002544 | kinesin-associated protein 3(Kifap3)                                          | -0.930 |
| 21- to 104-week | ENSRNOG00000002697 | myotubularin related protein 1(Mtmr1)                                         | -0.930 |
| 21- to 104-week | ENSRNOG00000002736 | RAB GTPase activating protein 1-like(Rabgap11)                                | -0.930 |
| 21- to 104-week | ENSRNOG00000002755 | platelet-activating factor acetylhydrolase 1b, regulatory subunit 1(Pafah1b1) | -0.873 |
| 21- to 104-week | ENSRNOG00000002778 | apoptosis antagonizing transcription factor(Aatf)                             | -0.639 |
| 21- to 104-week | ENSRNOG00000002855 | replication factor C subunit 1(Rfc1)                                          | -0.750 |
| 21- to 104-week | ENSRNOG00000002882 | zinc finger CCHC-type containing 2(Zcchc2)                                    | -0.878 |
| 21- to 104-week | ENSRNOG00000003078 | DDB1 and CUL4 associated factor 6(Dcaf6)                                      | -0.894 |
| 21- to 104-week | ENSRNOG00000003186 | ankyrin repeat and sterile alpha motif domain containing 3(Anks3)             | -0.930 |
| 21- to 104-week | ENSRNOG00000003213 | helicase with zinc finger(Helz)                                               | -0.750 |
| 21- to 104-week | ENSRNOG00000003258 | cell division cycle 73(Cdc73)                                                 | -0.930 |
| 21- to 104-week | ENSRNOG00000003273 | spermatogenesis associated 20(Spata20)                                        | -0.930 |
| 21- to 104-week | ENSRNOG00000003550 | acyl-CoA binding domain containing 6(Acbd6)                                   | -0.873 |
| 21- to 104-week | ENSRNOG00000003695 | MGAT4 family, member D(Mgat4d)                                                | -0.894 |
| 21- to 104-week | ENSRNOG00000003908 | centrosomal protein 128(Cep128)                                               | -0.873 |
| 21- to 104-week | ENSRNOG00000003955 | spermatogenesis associated 7(Spata7)                                          | -0.750 |
| 21- to 104-week | ENSRNOG00000003979 | zinc finger RANBP2-type containing 3(Zranb3)                                  | -0.639 |
| 21- to 104-week | ENSRNOG00000003991 | ankyrin and armadillo repeat containing(Ankar)                                | -0.930 |
| 21- to 104-week | ENSRNOG00000004076 | PMS1 homolog 1, mismatch repair system component(Pms1)                        | -0.750 |
| 21- to 104-week | ENSRNOG00000004085 | T cell activation inhibitor, mitochondrial(Tcaim)                             | -0.750 |
| 21- to 104-week | ENSRNOG00000004181 | serologically defined colon cancer antigen 8(Sdccag8)                         | -0.750 |
| 21- to 104-week | ENSRNOG00000004185 | MON2 homolog, regulator of endosome-to-Golgi trafficking(Mon2)                | -0.750 |
| 21- to 104-week | ENSRNOG00000004201 | regulating synaptic membrane exocytosis 2(Rims2)                              | -0.873 |
| 21- to 104-week | ENSRNOG00000004290 | growth factor receptor bound protein 10(Grb10)                                | -0.930 |
| 21- to 104-week | ENSRNOG00000004364 | brain and reproductive organ-expressed (TNFRSF1A modulator)(Bre)              | -0.783 |
| 21- to 104-week | ENSRNOG00000004456 | clathrin heavy chain linker domain containing 1(Clhc1)                        | -0.750 |
| 21- to 104-week | ENSRNOG00000004493 | taspase 1(Tasp1)                                                              | -0.639 |
| 21- to 104-week | ENSRNOG00000004534 | speedy/RINGO cell cycle regulator family member A(Spdy)                       | -0.750 |
| 21- to 104-week | ENSRNOG00000004564 | leucine-rich repeats and IQ motif containing 1(Lrriq1)                        | -0.930 |
| 21- to 104-week | ENSRNOG00000004585 | transmembrane and tetratricopeptide repeat containing 2(Tmtc2)                | -0.639 |
| 21- to 104-week | ENSRNOG00000004621 | reticulon 4(Rtn4)                                                             | -0.930 |
| 21- to 104-week | ENSRNOG00000004682 | PARP1 binding protein(Parpbp)                                                 | -0.930 |
| 21- to 104-week | ENSRNOG00000004736 | Ral GEF with PH domain and SH3 binding motif 2(Ralgps2)                       | -0.873 |
| 21- to 104-week | ENSRNOG00000004826 | SOS Ras/Rho guanine nucleotide exchange factor 2(Sos2)                        | -0.671 |
| 21- to 104-week | ENSRNOG00000004908 | structural maintenance of chromosomes 6(Smc6)                                 | -0.639 |

| Age             | Ensembl ID         | Gene name                                                                      | $\rho$ |
|-----------------|--------------------|--------------------------------------------------------------------------------|--------|
| 21- to 104-week | ENSRNOG00000005042 | RAN binding protein 17(Ranbp17)                                                | -0.894 |
| 21- to 104-week | ENSRNOG00000005081 | F-box and leucine-rich repeat protein 20(Fbxl20)                               | -0.750 |
| 21- to 104-week | ENSRNOG00000005101 | cutaneous T-cell lymphoma-associated antigen 5 homolog(LOC100912115)           | -0.750 |
| 21- to 104-week | ENSRNOG00000005105 | Sad1 and UNC84 domain containing 3(Sun3)                                       | -0.639 |
| 21- to 104-week | ENSRNOG00000005233 | leucine rich repeat containing 6(Lrrc6)                                        | -0.930 |
| 21- to 104-week | ENSRNOG00000005433 | SHQ1, H/ACA ribonucleoprotein assembly factor(Shq1)                            | -0.639 |
| 21- to 104-week | ENSRNOG00000005907 | RAD18 E3 ubiquitin protein ligase(Rad18)                                       | -0.930 |
| 21- to 104-week | ENSRNOG00000005916 | protein phosphatase, Mg <sup>2+</sup> /Mn <sup>2+</sup> dependent, 1A(Ppm1a)   | -0.750 |
| 21- to 104-week | ENSRNOG00000005927 | cleavage and polyadenylation specific factor 6(Cpsf6)                          | -0.894 |
| 21- to 104-week | ENSRNOG00000005934 | muscular LMNA-interacting protein(Mlip)                                        | -0.930 |
| 21- to 104-week | ENSRNOG00000006001 | LUC7-like 2 pre-mRNA splicing factor(Luc7l2)                                   | -0.930 |
| 21- to 104-week | ENSRNOG00000006002 | serine/threonine kinase 35(Stk35)                                              | -0.750 |
| 21- to 104-week | ENSRNOG00000006114 | cilia and flagella associated protein 69(Cfap69)                               | -0.750 |
| 21- to 104-week | ENSRNOG00000006136 | 3-phosphoinositide dependent protein kinase-1(Pdk1)                            | -0.750 |
| 21- to 104-week | ENSRNOG00000006180 | pumilio RNA-binding family member 2(Pum2)                                      | -0.750 |
| 21- to 104-week | ENSRNOG00000006235 | neural EGFL like 2(Nell2)                                                      | -0.750 |
| 21- to 104-week | ENSRNOG00000006248 | tripartite motif-containing 37(Trim37)                                         | -0.873 |
| 21- to 104-week | ENSRNOG00000006304 | MDM2 proto-oncogene(Mdm2)                                                      | -0.894 |
| 21- to 104-week | ENSRNOG00000006340 | mediator of cell motility 1(Memo1)                                             | -0.878 |
| 21- to 104-week | ENSRNOG00000006785 | DDB1 and CUL4 associated factor 8(Dcaf8)                                       | -0.783 |
| 21- to 104-week | ENSRNOG00000006816 | ubiquitin protein ligase E3 component n-recognin 5(Ubr5)                       | -0.873 |
| 21- to 104-week | ENSRNOG00000006828 | bromodomain adjacent to zinc finger domain, 1A(Baz1a)                          | -0.750 |
| 21- to 104-week | ENSRNOG00000006832 | zinc finger, DHHC-type containing 5(Zdhhc5)                                    | -0.873 |
| 21- to 104-week | ENSRNOG00000007054 | DEAH-box helicase 33(Dhx33)                                                    | -0.750 |
| 21- to 104-week | ENSRNOG00000007125 | VPS54 GARP complex subunit(Vps54)                                              | -0.930 |
| 21- to 104-week | ENSRNOG00000007127 | Bardet-Biedl syndrome 5(Bbs5)                                                  | -0.894 |
| 21- to 104-week | ENSRNOG00000007341 | maestro heat-like repeat family member 8(Mroh8)                                | -0.750 |
| 21- to 104-week | ENSRNOG00000007430 | SLX4 interacting protein(Slx4ip)                                               | -0.750 |
| 21- to 104-week | ENSRNOG00000007523 | chaperonin containing TCP1 subunit 6B(Cct6b)                                   | -0.930 |
| 21- to 104-week | ENSRNOG00000007568 | spermatogenesis associated 6(Spata6)                                           | -0.639 |
| 21- to 104-week | ENSRNOG00000007646 | signal-induced proliferation-associated 1 like 1(Sipa1l1)                      | -0.639 |
| 21- to 104-week | ENSRNOG00000007730 | vomer nasal 2 receptor, 53(Vom2r53)                                            | -0.930 |
| 21- to 104-week | ENSRNOG00000007748 | testis expressed 15(Tex15)                                                     | -0.930 |
| 21- to 104-week | ENSRNOG00000007867 | RNA guanylyltransferase and 5'-phosphatase(Rngtt)                              | -0.930 |
| 21- to 104-week | ENSRNOG00000008034 | transmembrane protein with EGF-like and two follistatin-like domains 1(Tmeff1) | -0.878 |
| 21- to 104-week | ENSRNOG00000008053 | ATPase phospholipid transporting 8A2(Atp8a2)                                   | -0.930 |
| 21- to 104-week | ENSRNOG00000008075 | intraflagellar transport 74(Ift74)                                             | -0.639 |
| 21- to 104-week | ENSRNOG00000008393 | Tax1 binding protein 1(Tax1bp1)                                                | -0.930 |
| 21- to 104-week | ENSRNOG00000008410 | centrosomal protein 63(Cep63)                                                  | -0.930 |
| 21- to 104-week | ENSRNOG00000008463 | RUN domain containing 3B(Rundc3b)                                              | -0.639 |
| 21- to 104-week | ENSRNOG00000008524 | glucocorticoid induced 1(Glcci1)                                               | -0.750 |

| Age             | Ensembl ID         | Gene name                                                                   | $\rho$ |
|-----------------|--------------------|-----------------------------------------------------------------------------|--------|
| 21- to 104-week | ENSRNOG00000008775 | leucine-rich repeats and guanylate kinase domain containing(Lrguk)          | -0.930 |
| 21- to 104-week | ENSRNOG00000008806 | CAP-GLY domain containing linker protein family, member 4(Clip4)            | -0.750 |
| 21- to 104-week | ENSRNOG00000008859 | TRAF family member-associated NFkB activator(Tank)                          | -0.878 |
| 21- to 104-week | ENSRNOG00000008869 | protein phosphatase 1, regulatory subunit 9A(Ppp1r9a)                       | -0.750 |
| 21- to 104-week | ENSRNOG00000008929 | AE binding protein 2(Aebp2)                                                 | -0.930 |
| 21- to 104-week | ENSRNOG00000008986 | diaphanous-related formin 3(Diaph3)                                         | -0.878 |
| 21- to 104-week | ENSRNOG00000009034 | tudor domain containing 3(Tdrd3)                                            | -0.750 |
| 21- to 104-week | ENSRNOG00000009208 | progesterone immunomodulatory binding factor 1(Pibf1)                       | -0.930 |
| 21- to 104-week | ENSRNOG00000009264 | ELKS/RAB6-interacting/CAST family member 1(Erc1)                            | -0.873 |
| 21- to 104-week | ENSRNOG00000009278 | intraflagellar transport 88(Ift88)                                          | -0.930 |
| 21- to 104-week | ENSRNOG00000009303 | zwilch kinetochore protein(Zwilch)                                          | -0.768 |
| 21- to 104-week | ENSRNOG00000009318 | tubulin tyrosine ligase like 5(Ttl5)                                        | -0.878 |
| 21- to 104-week | ENSRNOG00000009338 | KRAS proto-oncogene, GTPase(Kras)                                           | -0.930 |
| 21- to 104-week | ENSRNOG00000009539 | KH RNA binding domain containing, signal transduction associated 3(Khdrbs3) | -0.639 |
| 21- to 104-week | ENSRNOG00000009555 | leucine-rich repeats and IQ motif containing 3(Lrriq3)                      | -0.930 |
| 21- to 104-week | ENSRNOG00000009585 | transcription factor 20(Tcf20)                                              | -0.873 |
| 21- to 104-week | ENSRNOG00000009664 | ankyrin repeat domain 42(Ankrd42)                                           | -0.894 |
| 21- to 104-week | ENSRNOG00000009690 | ring finger protein 219(Rnf219)                                             | -0.750 |
| 21- to 104-week | ENSRNOG00000009745 | protein phosphatase 3 catalytic subunit gamma(Ppp3cc)                       | -0.873 |
| 21- to 104-week | ENSRNOG00000009766 | G protein-coupled receptor 180(Gpr180)                                      | -0.750 |
| 21- to 104-week | ENSRNOG00000009792 | zinc finger, B-box domain containing(Zbbx)                                  | -0.930 |
| 21- to 104-week | ENSRNOG00000009808 | intraflagellar transport 80(Ift80)                                          | -0.894 |
| 21- to 104-week | ENSRNOG00000009812 | SET binding factor 2(Sbf2)                                                  | -0.894 |
| 21- to 104-week | ENSRNOG00000009851 | solute carrier family 38, member 9(Slc38a9)                                 | -0.873 |
| 21- to 104-week | ENSRNOG00000009930 | phosphatidylinositol glycan anchor biosynthesis, class O(Pigo)              | -0.639 |
| 21- to 104-week | ENSRNOG00000009956 | WNK lysine deficient protein kinase 1(Wnk1)                                 | -0.659 |
| 21- to 104-week | ENSRNOG00000010024 | cytochrome b5 reductase 4(Cyb5r4)                                           | -0.878 |
| 21- to 104-week | ENSRNOG00000010027 | ATR serine/threonine kinase(Atr)                                            | -0.894 |
| 21- to 104-week | ENSRNOG00000010150 | spermatid perinuclear RNA binding protein(Strbp)                            | -0.873 |
| 21- to 104-week | ENSRNOG00000010155 | pericentriolar material 1(Pcm1)                                             | -0.659 |
| 21- to 104-week | ENSRNOG00000010418 | NIMA-related kinase 1(Nek1)                                                 | -0.873 |
| 21- to 104-week | ENSRNOG00000010479 | MYC binding protein 2, E3 ubiquitin protein ligase(Mycbp2)                  | -0.878 |
| 21- to 104-week | ENSRNOG00000010517 | family with sequence similarity 126, member A(Fam126a)                      | -0.878 |
| 21- to 104-week | ENSRNOG00000010526 | DENN domain containing 1A(Dennd1a)                                          | -0.878 |
| 21- to 104-week | ENSRNOG00000010536 | nuclear receptor subfamily 2, group C, member 2(Nr2c2)                      | -0.750 |
| 21- to 104-week | ENSRNOG00000010567 | angel homolog 1(Angel1)                                                     | -0.930 |
| 21- to 104-week | ENSRNOG00000010624 | adaptor-related protein complex 3, beta 1 subunit(Ap3b1)                    | -0.768 |
| 21- to 104-week | ENSRNOG00000010637 | TBC1 domain family, member 5(Tbc1d5)                                        | -0.873 |
| 21- to 104-week | ENSRNOG00000010815 | E74-like factor 2(Elf2)                                                     | -0.894 |
| 21- to 104-week | ENSRNOG00000010819 | heat shock protein 4-like(Hspa4l)                                           | -0.894 |
| 21- to 104-week | ENSRNOG00000010952 | intraflagellar transport 122(Ift122)                                        | -0.750 |

| Age             | Ensembl ID         | Gene name                                                                   | $\rho$ |
|-----------------|--------------------|-----------------------------------------------------------------------------|--------|
| 21- to 104-week | ENSRNOG00000010957 | B-Raf proto-oncogene, serine/threonine kinase(Braf)                         | -0.750 |
| 21- to 104-week | ENSRNOG00000011000 | regulating synaptic membrane exocytosis 1(Rims1)                            | -0.894 |
| 21- to 104-week | ENSRNOG00000011024 | zinc finger, DHHC-type containing 20(Zdhhc20)                               | -0.750 |
| 21- to 104-week | ENSRNOG00000011059 | tau tubulin kinase 2(Ttbk2)                                                 | -0.894 |
| 21- to 104-week | ENSRNOG00000011063 | DENN domain containing 1B(Dennd1b)                                          | -0.873 |
| 21- to 104-week | ENSRNOG00000011066 | membrane associated ring-CH-type finger 6(March6)                           | -0.930 |
| 21- to 104-week | ENSRNOG00000011094 | EF-hand calcium binding domain 6(Efcab6)                                    | -0.750 |
| 21- to 104-week | ENSRNOG00000011199 | poly (ADP-ribose) polymerase family, member 6(Parp6)                        | -0.639 |
| 21- to 104-week | ENSRNOG00000011307 | sarcolemma associated protein(Slmap)                                        | -0.764 |
| 21- to 104-week | ENSRNOG00000011376 | basal body orientation factor 1(Bbof1)                                      | -0.750 |
| 21- to 104-week | ENSRNOG00000011417 | phosphodiesterase 3B(Pde3b)                                                 | -0.894 |
| 21- to 104-week | ENSRNOG00000011453 | kinesin family member 6(Kif6)                                               | -0.750 |
| 21- to 104-week | ENSRNOG00000011603 | calcium binding protein 39-like(Cab39l)                                     | -0.750 |
| 21- to 104-week | ENSRNOG00000011619 | myosin IXA(Myo9a)                                                           | -0.873 |
| 21- to 104-week | ENSRNOG00000011625 | tankyrase(Tnks)                                                             | -0.750 |
| 21- to 104-week | ENSRNOG00000011627 | zinc finger RNA binding protein(Zfr)                                        | -0.783 |
| 21- to 104-week | ENSRNOG00000011669 | glutathione S-transferase, C-terminal domain containing(Gstcd)              | -0.930 |
| 21- to 104-week | ENSRNOG00000011791 | zinc finger AN1-type containing 4(Zfand4)                                   | -0.930 |
| 21- to 104-week | ENSRNOG00000011847 | G protein-coupled receptor kinase 4(Grk4)                                   | -0.878 |
| 21- to 104-week | ENSRNOG00000012015 | leucine rich repeat containing 49(Lrrc49)                                   | -0.639 |
| 21- to 104-week | ENSRNOG00000012055 | mannosidase, alpha, class 2A, member 2(Man2a2)                              | -0.894 |
| 21- to 104-week | ENSRNOG00000012237 | radixin(Rdx)                                                                | -0.750 |
| 21- to 104-week | ENSRNOG00000012325 | adenosine kinase(Adk)                                                       | -0.930 |
| 21- to 104-week | ENSRNOG00000012486 | primase (DNA) subunit 2(Prim2)                                              | -0.750 |
| 21- to 104-week | ENSRNOG00000012536 | sphingomyelin synthase 1(Sgms1)                                             | -0.878 |
| 21- to 104-week | ENSRNOG00000012637 | amyotrophic lateral sclerosis 2 chromosome region, candidate 11(Als2cr11)   | -0.750 |
| 21- to 104-week | ENSRNOG00000012655 | ADAM metalloproteinase with thrombospondin type 1 motif, 6(Adamts6)         | -0.930 |
| 21- to 104-week | ENSRNOG00000012719 | tudor domain containing 12(Tdrd12)                                          | -0.930 |
| 21- to 104-week | ENSRNOG00000013061 | tumor suppressor candidate 3(Tusc3)                                         | -0.639 |
| 21- to 104-week | ENSRNOG00000013293 | methylcrotonoyl-CoA carboxylase 1(Mccc1)                                    | -0.750 |
| 21- to 104-week | ENSRNOG00000013318 | coiled-coil domain containing 150(Ccdc150)                                  | -0.894 |
| 21- to 104-week | ENSRNOG00000013322 | DNA polymerase alpha 1, catalytic subunit(Pola1)                            | -0.639 |
| 21- to 104-week | ENSRNOG00000013529 | serine/threonine kinase 4(Stk4)                                             | -0.894 |
| 21- to 104-week | ENSRNOG00000013533 | apoptotic chromatin condensation inducer 1(Acin1)                           | -0.750 |
| 21- to 104-week | ENSRNOG00000013780 | neurofibromin 1(Nf1)                                                        | -0.878 |
| 21- to 104-week | ENSRNOG00000013962 | membrane associated guanylate kinase, WW and PDZ domain containing 2(Magi2) | -0.750 |
| 21- to 104-week | ENSRNOG00000014139 | sodium channel and clathrin linker 1(Sclt1)                                 | -0.878 |
| 21- to 104-week | ENSRNOG00000014163 | zinc finger protein 536(Zfp536)                                             | -0.750 |
| 21- to 104-week | ENSRNOG00000014248 | erb-b2 receptor tyrosine kinase 4(ErbB4)                                    | -0.750 |
| 21- to 104-week | ENSRNOG00000014276 | phospholipase C, epsilon 1(Plce1)                                           | -0.750 |
| 21- to 104-week | ENSRNOG00000014368 | eukaryotic translation initiation factor 4 gamma, 3(Eif4g3)                 | -0.878 |

| Age             | Ensembl ID         | Gene name                                                         | $\rho$ |
|-----------------|--------------------|-------------------------------------------------------------------|--------|
| 21- to 104-week | ENSRNOG00000014486 | regulatory factor X3(Rfx3)                                        | -0.894 |
| 21- to 104-week | ENSRNOG00000014513 | exonuclease NEF-sp(Exnef)                                         | -0.894 |
| 21- to 104-week | ENSRNOG00000014576 | dedicator of cyto-kinesis 3(Dock3)                                | -0.873 |
| 21- to 104-week | ENSRNOG00000014584 | outer dense fiber of sperm tails 2(Odf2)                          | -0.750 |
| 21- to 104-week | ENSRNOG00000014590 | serine/threonine kinase 33(Stk33)                                 | -0.750 |
| 21- to 104-week | ENSRNOG00000014670 | zinc finger, MYND-type containing 11(Zmynd11)                     | -0.750 |
| 21- to 104-week | ENSRNOG00000014775 | nucleolar protein 4(Nol4)                                         | -0.930 |
| 21- to 104-week | ENSRNOG00000014875 | ASH2 like histone lysine methyltransferase complex subunit(Ash2l) | -0.894 |
| 21- to 104-week | ENSRNOG00000014893 | WD repeat domain 63(Wdr63)                                        | -0.750 |
| 21- to 104-week | ENSRNOG00000015097 | potassium channel modulatory factor 1(Kcmf1)                      | -0.750 |
| 21- to 104-week | ENSRNOG00000015189 | Bardet-Biedl syndrome 9(Bbs9)                                     | -0.873 |
| 21- to 104-week | ENSRNOG00000015288 | disco-interacting protein 2 homolog C(Dip2c)                      | -0.750 |
| 21- to 104-week | ENSRNOG00000015339 | SHOC2 leucine-rich repeat scaffold protein(Shoc2)                 | -0.750 |
| 21- to 104-week | ENSRNOG00000015357 | BMP-binding endothelial regulator(Bmper)                          | -0.930 |
| 21- to 104-week | ENSRNOG00000015440 | Werner syndrome RecQ like helicase(Wrn)                           | -0.750 |
| 21- to 104-week | ENSRNOG00000015528 | praja ring finger ubiquitin ligase 2(Pja2)                        | -0.750 |
| 21- to 104-week | ENSRNOG00000015734 | ubiquitin protein ligase E3A(Ube3a)                               | -0.894 |
| 21- to 104-week | ENSRNOG00000015783 | ATP-binding cassette, subfamily A (ABC1), member 16(Abca16)       | -0.750 |
| 21- to 104-week | ENSRNOG00000015898 | FER tyrosine kinase(Fer)                                          | -0.878 |
| 21- to 104-week | ENSRNOG00000015977 | zinc finger protein 609(Zfp609)                                   | -0.659 |
| 21- to 104-week | ENSRNOG00000016121 | thyroid hormone receptor interactor 4(Trip4)                      | -0.750 |
| 21- to 104-week | ENSRNOG00000016133 | small ubiquitin-like modifier 1(Sumo1)                            | -0.750 |
| 21- to 104-week | ENSRNOG00000016152 | DEK proto-oncogene(Dek)                                           | -0.750 |
| 21- to 104-week | ENSRNOG00000016183 | intracisternal A particle-promoted polypeptide(Ipp)               | -0.671 |
| 21- to 104-week | ENSRNOG00000016360 | G protein pathway suppressor 2(Gps2)                              | -0.930 |
| 21- to 104-week | ENSRNOG00000016454 | nuclear autoantigenic sperm protein(Nasp)                         | -0.750 |
| 21- to 104-week | ENSRNOG00000016545 | intraflagellar transport 140(Ift140)                              | -0.750 |
| 21- to 104-week | ENSRNOG00000016620 | casein kinase 1, gamma 1(Csnk1g1)                                 | -0.894 |
| 21- to 104-week | ENSRNOG00000016635 | similar to K04F10.2(LOC361646)                                    | -0.750 |
| 21- to 104-week | ENSRNOG00000016703 | general transcription factor 2A subunit 1 like(Gtf2a11)           | -0.930 |
| 21- to 104-week | ENSRNOG00000016717 | growth arrest-specific 2(Gas2)                                    | -0.894 |
| 21- to 104-week | ENSRNOG00000016722 | exportin 6(Xpo6)                                                  | -0.750 |
| 21- to 104-week | ENSRNOG00000016815 | transmembrane protein 135(Tmem135)                                | -0.750 |
| 21- to 104-week | ENSRNOG00000016835 | synaptonemal complex protein 1(Sycp1)                             | -0.873 |
| 21- to 104-week | ENSRNOG00000016910 | Ral GEF with PH domain and SH3 binding motif 1(Ralgps1)           | -0.894 |
| 21- to 104-week | ENSRNOG00000016963 | thyroid hormone receptor interactor 12(Trip12)                    | -0.671 |
| 21- to 104-week | ENSRNOG00000016992 | POTE ankyrin domain family, member C(Potec)                       | -0.930 |
| 21- to 104-week | ENSRNOG00000017074 | RAB28, member RAS oncogene family(Rab28)                          | -0.750 |
| 21- to 104-week | ENSRNOG00000017178 | Hydin, axonemal central pair apparatus protein(Hydin)             | -0.930 |
| 21- to 104-week | ENSRNOG00000017282 | testis-specific kinase 2(Tesk2)                                   | -0.930 |
| 21- to 104-week | ENSRNOG00000017505 | aminopeptidase O(Npepo)                                           | -0.659 |

| Age             | Ensembl ID         | Gene name                                                    | $\rho$ |
|-----------------|--------------------|--------------------------------------------------------------|--------|
| 21- to 104-week | ENSRNOG00000017518 | ADAM metallopeptidase domain 5(Adam5)                        | -0.930 |
| 21- to 104-week | ENSRNOG00000017554 | ADAM metallopeptidase domain 3A(Adam3a)                      | -0.930 |
| 21- to 104-week | ENSRNOG00000017581 | similar to 4833420G17Rik protein(RGD1306227)                 | -0.750 |
| 21- to 104-week | ENSRNOG00000017608 | C2 calcium-dependent domain containing 3(C2cd3)              | -0.930 |
| 21- to 104-week | ENSRNOG00000017781 | DnaJ heat shock protein family (Hsp40) member C7(Dnajc7)     | -0.750 |
| 21- to 104-week | ENSRNOG00000017824 | nuclear receptor coactivator 5(Ncoa5)                        | -0.878 |
| 21- to 104-week | ENSRNOG00000017883 | calmodulin regulated spectrin-associated protein 1(Camsap1)  | -0.873 |
| 21- to 104-week | ENSRNOG00000018382 | inositol polyphosphate-4-phosphatase type II B(Inpp4b)       | -0.930 |
| 21- to 104-week | ENSRNOG00000018387 | WD repeat domain 7(Wdr7)                                     | -0.764 |
| 21- to 104-week | ENSRNOG00000018404 | alanyl-tRNA synthetase(Aars)                                 | -0.639 |
| 21- to 104-week | ENSRNOG00000018425 | dymeclin(Dym)                                                | -0.783 |
| 21- to 104-week | ENSRNOG00000018457 | protein phosphatase 2 phosphatase activator(Ptpa)            | -0.750 |
| 21- to 104-week | ENSRNOG00000018507 | glutamine fructose-6-phosphate transaminase 1(Gfpt1)         | -0.639 |
| 21- to 104-week | ENSRNOG00000018529 | casein kinase 1, gamma 2(Csnk1g2)                            | -0.930 |
| 21- to 104-week | ENSRNOG00000018651 | ATP/GTP binding protein 1(Agtppb1)                           | -0.655 |
| 21- to 104-week | ENSRNOG00000018946 | tripartite motif-containing 33(Trim33)                       | -0.878 |
| 21- to 104-week | ENSRNOG00000018996 | PHD finger protein 7(Phf7)                                   | -0.750 |
| 21- to 104-week | ENSRNOG00000019020 | Bardet-Biedl syndrome 2(Bbs2)                                | -0.930 |
| 21- to 104-week | ENSRNOG00000019069 | nuclear RNA export factor 1(Nxf1)                            | -0.783 |
| 21- to 104-week | ENSRNOG00000019105 | dipeptidylpeptidase 8(Dpp8)                                  | -0.783 |
| 21- to 104-week | ENSRNOG00000019271 | unc-51 like kinase 4(Ulk4)                                   | -0.930 |
| 21- to 104-week | ENSRNOG00000019272 | G kinase anchoring protein 1(Gkap1)                          | -0.894 |
| 21- to 104-week | ENSRNOG00000019671 | round spermatid basic protein 1(Rsbn1)                       | -0.639 |
| 21- to 104-week | ENSRNOG00000019752 | solute carrier family 29 member 1(Slc29a1)                   | -0.930 |
| 21- to 104-week | ENSRNOG00000019826 | SIL1 nucleotide exchange factor(Sil1)                        | -0.768 |
| 21- to 104-week | ENSRNOG00000020118 | NME/NM23 family member 5(Nme5)                               | -0.930 |
| 21- to 104-week | ENSRNOG00000020191 | TBC1 domain family, member 17(Tbc1d17)                       | -0.750 |
| 21- to 104-week | ENSRNOG00000020203 | protein tyrosine phosphatase, non-receptor type 20(Ptpn20)   | -0.930 |
| 21- to 104-week | ENSRNOG00000020269 | SURP and G patch domain containing 2(Sugp2)                  | -0.930 |
| 21- to 104-week | ENSRNOG00000020344 | syntrophin, beta 2(Sntb2)                                    | -0.894 |
| 21- to 104-week | ENSRNOG00000020425 | stromal interaction molecule 1(Stim1)                        | -0.750 |
| 21- to 104-week | ENSRNOG00000020500 | CDC-like kinase 2(Clk2)                                      | -0.894 |
| 21- to 104-week | ENSRNOG00000020514 | SRY box 6(Sox6)                                              | -0.930 |
| 21- to 104-week | ENSRNOG00000020689 | cytoplasmic polyadenylation element binding protein 3(Cpeb3) | -0.878 |
| 21- to 104-week | ENSRNOG00000020748 | microtubule-associated protein 4(Map4)                       | -0.930 |
| 21- to 104-week | ENSRNOG00000020915 | SET domain containing 2(Setd2)                               | -0.894 |
| 21- to 104-week | ENSRNOG00000021044 | G patch domain containing 8(Gpatch8)                         | -0.750 |
| 21- to 104-week | ENSRNOG00000021203 | atlastin GTPase 3(Atl3)                                      | -0.639 |
| 21- to 104-week | ENSRNOG00000021222 | VPS16 CORVET/HOPS core subunit(Vps16)                        | -0.750 |
| 21- to 104-week | ENSRNOG00000021497 | AKT serine/threonine kinase 3(Akt3)                          | -0.764 |
| 21- to 104-week | ENSRNOG00000021569 | T-cell lymphoma invasion and metastasis 1(Tiam1)             | -0.750 |
| 21- to 104-week | ENSRNOG00000022141 | CTD small phosphatase like 2(Ctdspl2)                        | -0.750 |

| Age             | Ensembl ID         | Gene name                                                                | $\rho$ |
|-----------------|--------------------|--------------------------------------------------------------------------|--------|
| 21- to 104-week | ENSRNOG00000022156 | coiled-coil domain containing 178(Ccdc178)                               | -0.750 |
| 21- to 104-week | ENSRNOG00000022162 | PBX homeobox 3(Pbx3)                                                     | -0.639 |
| 21- to 104-week | ENSRNOG00000022249 | myeloid/lymphoid or mixed-lineage leukemia; translocated to, 10(Mllt10)  | -0.639 |
| 21- to 104-week | ENSRNOG00000022343 | ALMS1, centrosome and basal body associated protein(Alms1)               | -0.873 |
| 21- to 104-week | ENSRNOG00000022445 | IQ motif containing F3(Iqcf3)                                            | -0.750 |
| 21- to 104-week | ENSRNOG00000022720 | ubiquitin specific peptidase 37(Usp37)                                   | -0.639 |
| 21- to 104-week | ENSRNOG00000022845 | centrosomal protein 70(Cep70)                                            | -0.750 |
| 21- to 104-week | ENSRNOG00000023202 | ubiquitin specific peptidase 15(Usp15)                                   | -0.894 |
| 21- to 104-week | ENSRNOG00000023566 | von Willebrand factor A domain containing 3B(Vwa3b)                      | -0.930 |
| 21- to 104-week | ENSRNOG00000023698 | testis expressed 14, intercellular bridge forming factor(Tex14)          | -0.750 |
| 21- to 104-week | ENSRNOG00000023807 | cyclin Y-like 1(Ccny1)                                                   | -0.639 |
| 21- to 104-week | ENSRNOG00000023941 | family with sequence similarity 178, member B(Fam178b)                   | -0.930 |
| 21- to 104-week | ENSRNOG00000024025 | enhancer of mRNA decapping 4(Edc4)                                       | -0.750 |
| 21- to 104-week | ENSRNOG00000024402 | focadhesin(Focad)                                                        | -0.894 |
| 21- to 104-week | ENSRNOG00000024503 | neuroblastoma amplified sequence(Nbas)                                   | -0.894 |
| 21- to 104-week | ENSRNOG00000024521 | spermatogenesis associated 16(Spata16)                                   | -0.750 |
| 21- to 104-week | ENSRNOG00000024530 | LYR motif containing 1(Lyrm1)                                            | -0.930 |
| 21- to 104-week | ENSRNOG00000024545 | coiled-coil domain containing 18(Ccdc18)                                 | -0.639 |
| 21- to 104-week | ENSRNOG00000024563 | glucosidase, alpha; neutral C(Ganc)                                      | -0.930 |
| 21- to 104-week | ENSRNOG00000024808 | serine threonine kinase 39(Stk39)                                        | -0.873 |
| 21- to 104-week | ENSRNOG00000024837 | transmembrane phosphoinositide 3-phosphatase and tensin homolog 2(Tpte2) | -0.930 |
| 21- to 104-week | ENSRNOG00000024870 | ankyrin repeat and sterile alpha motif domain containing 1B(Anks1b)      | -0.639 |
| 21- to 104-week | ENSRNOG00000024878 | RNA binding motif protein 44(Rbm44)                                      | -0.930 |
| 21- to 104-week | ENSRNOG00000025141 | kizuna centrosomal protein(Kiz)                                          | -0.894 |
| 21- to 104-week | ENSRNOG00000025332 | CD109 molecule(Cd109)                                                    | -0.750 |
| 21- to 104-week | ENSRNOG00000025418 | armadillo repeat containing 9(Armc9)                                     | -0.894 |
| 21- to 104-week | ENSRNOG00000025420 | CKLF-like MARVEL transmembrane domain containing 2A(Cmtm2a)              | -0.750 |
| 21- to 104-week | ENSRNOG00000025528 | EFR3 homolog A(Efr3a)                                                    | -0.750 |
| 21- to 104-week | ENSRNOG00000025551 | regulator of G-protein signaling 22(Rgs22)                               | -0.930 |
| 21- to 104-week | ENSRNOG00000025672 | testis expressed 11(Tex11)                                               | -0.750 |
| 21- to 104-week | ENSRNOG00000025728 | ADAM metallopeptidase domain 32(Adam32)                                  | -0.930 |
| 21- to 104-week | ENSRNOG00000025787 | sperm associated antigen 6(Spag6)                                        | -0.930 |
| 21- to 104-week | ENSRNOG00000025823 | RNA binding motif protein 46(Rbm46)                                      | -0.894 |
| 21- to 104-week | ENSRNOG00000026180 | leucine zipper and EF-hand containing transmembrane protein 2(Letm2)     | -0.750 |
| 21- to 104-week | ENSRNOG00000026277 | zinc finger CCCH type containing 6(Zc3h6)                                | -0.750 |
| 21- to 104-week | ENSRNOG00000026589 | dpy-19 like 1(Dpy19l1)                                                   | -0.930 |
| 21- to 104-week | ENSRNOG00000026610 | akirin 1(Akirin1)                                                        | -0.750 |
| 21- to 104-week | ENSRNOG00000026845 | family with sequence similarity 81, member B(Fam81b)                     | -0.750 |
| 21- to 104-week | ENSRNOG00000027012 | ubiquitin specific peptidase 54(Usp54)                                   | -0.894 |
| 21- to 104-week | ENSRNOG00000027250 | RNA binding motif protein 27(Rbm27)                                      | -0.655 |

| Age             | Ensembl ID         | Gene name                                                                       | $\rho$ |
|-----------------|--------------------|---------------------------------------------------------------------------------|--------|
| 21- to 104-week | ENSRNOG00000027617 | tetratricopeptide repeat domain 26(Ttc26)                                       | -0.930 |
| 21- to 104-week | ENSRNOG00000027801 | zona pellucida binding protein(Zpbp)                                            | -0.878 |
| 21- to 104-week | ENSRNOG00000027929 | DNA polymerase nu(Poln)                                                         | -0.894 |
| 21- to 104-week | ENSRNOG00000027992 | DS cell adhesion molecule(Dscam)                                                | -0.750 |
| 21- to 104-week | ENSRNOG00000028227 | polybromo 1(Pbrm1)                                                              | -0.930 |
| 21- to 104-week | ENSRNOG00000028501 | zinc finger CCCH-type containing 18(Zc3h18)                                     | -0.750 |
| 21- to 104-week | ENSRNOG00000029235 | Scm-like with four mbt domains 2(Sfmbt2)                                        | -0.750 |
| 21- to 104-week | ENSRNOG00000029773 | ATM serine/threonine kinase(Atm)                                                | -0.930 |
| 21- to 104-week | ENSRNOG00000030705 | cleavage and polyadenylation specific factor 1(Cpsf1)                           | -0.750 |
| 21- to 104-week | ENSRNOG00000031247 | leucine, glutamate and lysine rich 1(Lekr1)                                     | -0.894 |
| 21- to 104-week | ENSRNOG00000031479 | high density lipoprotein binding protein(Hdlbp)                                 | -0.750 |
| 21- to 104-week | ENSRNOG00000032180 | coiled-coil domain containing 15(Ccdc15)                                        | -0.639 |
| 21- to 104-week | ENSRNOG00000032570 | structural maintenance of chromosomes 1B(Smc1b)                                 | -0.750 |
| 21- to 104-week | ENSRNOG00000032574 | scribbled planar cell polarity protein(Scrib)                                   | -0.930 |
| 21- to 104-week | ENSRNOG00000033169 | cytoplasmic polyadenylation element binding protein 4(Cpeb4)                    | -0.750 |
| 21- to 104-week | ENSRNOG00000033528 | tolloid-like 1(Tll1)                                                            | -0.930 |
| 21- to 104-week | ENSRNOG00000034026 | lysocardiolipin acyltransferase 1(Lclat1)                                       | -0.750 |
| 21- to 104-week | ENSRNOG00000034272 | protein inhibitor of activated STAT, 1(Pias1)                                   | -0.639 |
| 21- to 104-week | ENSRNOG00000036601 | exocyst complex component 6(Exoc6)                                              | -0.750 |
| 21- to 104-week | ENSRNOG00000036675 | BTB domain containing 16(Btbd16)                                                | -0.639 |
| 21- to 104-week | ENSRNOG00000036964 | Ral GTPase activating protein catalytic alpha subunit 2(Ralgapa2)               | -0.659 |
| 21- to 104-week | ENSRNOG00000036980 | zinc finger, GRF-type containing 1(Zgrf1)                                       | -0.750 |
| 21- to 104-week | ENSRNOG00000037865 | HORMA domain containing 2(Hormad2)                                              | -0.894 |
| 21- to 104-week | ENSRNOG00000038002 | coiled-coil domain containing 62(Ccdc62)                                        | -0.878 |
| 21- to 104-week | ENSRNOG00000038242 | similar to T-cell activation Rho GTPase-activating protein isoform b(LOC365791) | -0.930 |
| 21- to 104-week | ENSRNOG00000038436 | similar to RIKEN cDNA D630029K19(RGD1307100)                                    | -0.930 |
| 21- to 104-week | ENSRNOG00000039466 | hyaluronoglucosaminidase 5(Hyal5)                                               | -0.750 |
| 21- to 104-week | ENSRNOG00000039656 | ATP-binding cassette, subfamily A (ABC1), member 17(Abca17)                     | -0.750 |
| 21- to 104-week | ENSRNOG00000042068 | OTU deubiquitinase 7B(Otud7b)                                                   | -0.930 |
| 21- to 104-week | ENSRNOG00000042195 | poly(A) binding protein, nuclear 1(Pabpn1)                                      | -0.750 |
| 21- to 104-week | ENSRNOG00000042333 | dynein, axonemal, light chain 1(Dnal1)                                          | -0.639 |
| 21- to 104-week | ENSRNOG00000042359 | phosphatidylinositol glycan anchor biosynthesis, class K(Pigk)                  | -0.750 |
| 21- to 104-week | ENSRNOG00000042432 | NIMA-related kinase 11(Nek11)                                                   | -0.930 |
| 21- to 104-week | ENSRNOG00000042932 | tetratricopeptide repeat domain 27(Ttc27)                                       | -0.659 |
| 21- to 104-week | ENSRNOG00000043035 | F-box and leucine-rich repeat protein 13(Fbxl13)                                | -0.639 |
| 21- to 104-week | ENSRNOG00000045585 | dpy-19 like 2(Dpy19l2)                                                          | -0.894 |
| 21- to 104-week | ENSRNOG00000045639 | similar to KIAA0825 protein(RGD1560883)                                         | -0.750 |
| 21- to 104-week | ENSRNOG00000046023 | exocyst complex component 4(Exoc4)                                              | -0.930 |
| 21- to 104-week | ENSRNOG00000048411 | ubiquitin-like with PHD and ring finger domains 1(Uhrf1)                        | -0.750 |
| 21- to 104-week | ENSRNOG00000048719 | dystrobrevin binding protein 1(Dtnbp1)                                          | -0.930 |
| 21- to 104-week | ENSRNOG00000049507 | septin 10(Sept10)                                                               | -0.894 |



| Age             | Ensembl ID         | Gene name                                                                    | $\rho$ |
|-----------------|--------------------|------------------------------------------------------------------------------|--------|
| 21- to 104-week | ENSRNOG00000050191 | coiled-coil domain containing 7(Ccdc7)                                       | -0.894 |
| 21- to 104-week | ENSRNOG00000050233 | coiled-coil alpha-helical rod protein 1(Cchcr1)                              | -0.750 |
| 21- to 104-week | ENSRNOG00000050317 | UHRF1 binding protein 1-like(Uhrf1bp1)                                       | -0.750 |
| 21- to 104-week | ENSRNOG00000052688 | dynein, axonemal, heavy chain 2(Dnah2)                                       | -0.750 |
| 21- to 104-week | ENSRNOG00000053060 | zinc finger, C3H1-type containing(Zfc3h1)                                    | -0.639 |
| 21- to 104-week | ENSRNOG00000054058 | oxysterol binding protein-like 1A(Osbp1a)                                    | -0.750 |
| 21- to 104-week | ENSRNOG00000054331 | WD repeat containing planar cell polarity effector(Wdpcp)                    | -0.878 |
| 21- to 104-week | ENSRNOG00000054475 | uncharacterized LOC102550841(LOC102550841)                                   | -0.750 |
| 21- to 104-week | ENSRNOG00000055103 | cystic fibrosis transmembrane conductance regulator(Cftr)                    | -0.750 |
| 21- to 104-week | ENSRNOG00000055790 | nucleoporin 210-like(Nup210)                                                 | -0.750 |
| 21- to 104-week | ENSRNOG00000056330 | cyclic nucleotide binding domain containing 1(Cnbd1)                         | -0.750 |
| 21- to 104-week | ENSRNOG00000056654 | dyslexia susceptibility 1 candidate 1(Dyx1c1)                                | -0.750 |
| 21- to 104-week | ENSRNOG00000057102 | platelet-activating factor acetylhydrolase 1b, catalytic subunit 2(Pafah1b2) | -0.750 |
| 21- to 104-week | ENSRNOG00000057315 | potassium voltage-gated channel subfamily H member 3(Kcnh3)                  | -0.894 |
| 21- to 104-week | ENSRNOG00000057372 | methyltransferase like 6(Mettl6)                                             | -0.878 |
| 21- to 104-week | ENSRNOG00000057378 | C-type lectin domain family 16, member A(Clec16a)                            | -0.930 |
| 21- to 104-week | ENSRNOG00000057740 | coiled-coil domain containing 148(Ccdc148)                                   | -0.930 |
| 21- to 104-week | ENSRNOG00000057815 | coiled-coil domain containing 191(Ccdc191)                                   | -0.878 |
| 21- to 104-week | ENSRNOG00000057945 | Fanconi anemia, complementation group G(Fancg)                               | -0.930 |
| 21- to 104-week | ENSRNOG00000058275 | sperm flagellar 2(Spef2)                                                     | -0.750 |
| 21- to 104-week | ENSRNOG00000058681 | testis specific 10(Tsga10)                                                   | -0.750 |
| 21- to 104-week | ENSRNOG00000058733 | ArfGAP with SH3 domain, ankyrin repeat and PH domain 1(Asap1)                | -0.750 |
| 21- to 104-week | ENSRNOG00000059091 | similar to ankyrin-like protein(RGD1563748)                                  | -0.750 |
| 21- to 104-week | ENSRNOG00000059276 | similar to hypothetical protein FLJ10706(LOC498265)                          | -0.930 |
| 21- to 104-week | ENSRNOG00000059659 | zinc finger AN1-type containing 3(Zfand3)                                    | -0.750 |
| 21- to 104-week | ENSRNOG00000059865 | dynein, axonemal, heavy chain 12(Dnah12)                                     | -0.783 |
| 21- to 104-week | ENSRNOG00000060100 | kinetochore scaffold 1(Knl1)                                                 | -0.639 |
| 21- to 104-week | ENSRNOG00000060367 | regulatory factor X, 7(Rfx7)                                                 | -0.659 |
| 21- to 104-week | ENSRNOG00000060479 | Sp3 transcription factor(Sp3)                                                | -0.750 |
| 21- to 104-week | ENSRNOG00000060561 | glycerophosphodiester phosphodiesterase domain containing 1(Gdpd1)           | -0.894 |
| 21- to 104-week | ENSRNOG00000060626 | DNA polymerase kappa(Polk)                                                   | -0.639 |
| 21- to 104-week | ENSRNOG00000060984 | dynein, axonemal, heavy chain 7(Dnah7)                                       | -0.930 |
| 21- to 104-week | ENSRNOG00000061040 | HECT and RLD domain containing E3 ubiquitin protein ligase 4(Herc4)          | -0.873 |
| 21- to 104-week | ENSRNOG00000061050 | membrane bound O-acyltransferase domain containing 2(Mboat2)                 | -0.639 |
| 21- to 104-week | ENSRNOG00000061543 | adaptor-related protein complex 2, beta 1 subunit(Ap2b1)                     | -0.750 |
| 21- to 104-week | ENSRNOG00000061795 | RNA binding motif protein 4B(Rbm4b)                                          | -0.750 |

Note – The  $\rho$  values were calculated with *Spearman's* rank correlation test. Only the circRNAs with  $|\rho| > 0.6$  were listed.

**Supplementary Table S3. The host genes of the age-dependent circRNAs in adrenal gland, heart, kidney, liver, lung, muscle, spleen, thymus, and uterus**

| Tissue  | Ensembl ID         | Gene name                                                            | $\rho$ |
|---------|--------------------|----------------------------------------------------------------------|--------|
| Adrenal | ENSRNOG00000002983 | nuclear factor 1 X(Nf1x)                                             | 0.842  |
| Adrenal | ENSRNOG00000006997 | amyloid beta precursor protein(App)                                  | 0.655  |
| Adrenal | ENSRNOG00000008709 | Rho GTPase activating protein 32(Arhgap32)                           | 0.666  |
| Adrenal | ENSRNOG00000010853 | cholinergic receptor nicotinic alpha 7 subunit(Chrna7)               | 0.785  |
| Adrenal | ENSRNOG00000020769 | CREB3 regulatory factor(Crebrf)                                      | 0.639  |
| Adrenal | ENSRNOG00000029614 | roundabout guidance receptor 1(Robo1)                                | 0.647  |
| Adrenal | ENSRNOG00000032215 | chromodomain Y-like(Cdyl)                                            | 0.733  |
| Heart   | ENSRNOG00000001469 | elastin(Eln)                                                         | -0.808 |
| Heart   | ENSRNOG00000003357 | collagen type III alpha 1 chain(Col3a1)                              | -0.807 |
| Heart   | ENSRNOG00000003669 | myocardin(Myocd)                                                     | -0.638 |
| Heart   | ENSRNOG00000004444 | IKAROS family zinc finger 1(Ikzf1)                                   | 0.675  |
| Heart   | ENSRNOG00000015519 | carboxylesterase 1D(Ces1d)                                           | 0.844  |
| Heart   | ENSRNOG00000017583 | mitogen-activated protein kinase associated protein 1(Mapkap1)       | -0.634 |
| Heart   | ENSRNOG00000017879 | GRB2-associated binding protein 1(Gab1)                              | -0.624 |
| Heart   | ENSRNOG00000023679 | PR/SET domain 5(Prdm5)                                               | -0.718 |
| Heart   | ENSRNOG00000050183 | RT1 class I, locus1(RT1-CE1)                                         | 0.624  |
| Kidney  | ENSRNOG00000011504 | A-kinase anchoring protein 2(Akap2)                                  | 0.787  |
| Kidney  | ENSRNOG00000011517 | TNF receptor superfamily member 21(Tnfrsf21)                         | 0.615  |
| Kidney  | ENSRNOG00000013328 | RNA binding protein with multiple splicing(Rbpms)                    | 0.632  |
| Kidney  | ENSRNOG00000017172 | multivesicular body subunit 12B(Mvb12b)                              | -0.607 |
| Kidney  | ENSRNOG00000037851 | scaffolding protein involved in DNA repair(Spidr)                    | 0.793  |
| Lung    | ENSRNOG00000000142 | plexin domain containing 2(Plxdc2)                                   | -0.652 |
| Lung    | ENSRNOG00000000277 | tet methylcytosine dioxygenase 1(Tet1)                               | -0.716 |
| Lung    | ENSRNOG00000001469 | elastin(Eln)                                                         | -0.798 |
| Lung    | ENSRNOG00000003357 | collagen type III alpha 1 chain(Col3a1)                              | -0.772 |
| Lung    | ENSRNOG00000004208 | cysteine rich transmembrane BMP regulator 1(Crim1)                   | 0.651  |
| Lung    | ENSRNOG00000004444 | IKAROS family zinc finger 1(Ikzf1)                                   | 0.817  |
| Lung    | ENSRNOG00000011063 | DENN domain containing 1B(Dennd1b)                                   | 0.680  |
| Lung    | ENSRNOG00000011105 | ADP-ribosylation factor like GTPase 15(Arl15)                        | -0.754 |
| Lung    | ENSRNOG00000014647 | core-binding factor, beta subunit(Cbfb)                              | 0.662  |
| Lung    | ENSRNOG00000015519 | carboxylesterase 1D(Ces1d)                                           | 0.633  |
| Lung    | ENSRNOG00000017879 | GRB2-associated binding protein 1(Gab1)                              | -0.606 |
| Lung    | ENSRNOG00000019689 | von Willebrand factor(Vwf)                                           | 0.685  |
| Lung    | ENSRNOG00000032247 | B-cell scaffold protein with ankyrin repeats 1(Bank1)                | 0.675  |
| Lung    | ENSRNOG00000037080 | ADAM metallopeptidase with thrombospondin type 1 motif, 17(Adamts17) | -0.819 |
| Lung    | ENSRNOG00000045605 | UDP-glucuronate decarboxylase 1(Uxs1)                                | 0.720  |
| Lung    | ENSRNOG00000050183 | RT1 class I, locus1(RT1-CE1)                                         | 0.754  |
| Liver   | ENSRNOG00000016213 | single-stranded DNA binding protein 2(Ssbp2)                         | -0.607 |
| Liver   | ENSRNOG00000021405 | cytochrome P450, family 2, subfamily c, polypeptide 7(Cyp2c7)        | 0.779  |

| Tissue | Ensembl ID          | Gene name                                                                             | $\rho$ |
|--------|---------------------|---------------------------------------------------------------------------------------|--------|
| Liver  | ENSRNOG00000034013  | acetyl-CoA carboxylase alpha(Acaca)                                                   | 0.720  |
| Muscle | ENSRNOG00000001120  | mediator complex subunit 13-like(Med13l)                                              | -0.620 |
| Muscle | ENSRNOG00000001682  | tetratricopeptide repeat domain 3(Ttc3)                                               | -0.638 |
| Muscle | ENSRNOG00000002214  | kelch-like family member 8(Klhl8)                                                     | 0.713  |
| Muscle | ENSRNOG00000002451  | fibronectin type III domain containing 3C2(Fnd3c2)                                    | -0.775 |
| Muscle | ENSRNOG00000003357  | collagen type III alpha 1 chain(Col3a1)                                               | -0.832 |
| Muscle | ENSRNOG00000004050  | SNF related kinase(Snrk)                                                              | -0.697 |
| Muscle | ENSRNOG00000011504  | A-kinase anchoring protein 2(Akap2)                                                   | -0.668 |
| Muscle | ENSRNOG00000016213  | single-stranded DNA binding protein 2(Ssbp2)                                          | 0.802  |
| Muscle | ENSRNOG00000016684  | WNK lysine deficient protein kinase 2(Wnk2)                                           | 0.602  |
| Muscle | ENSRNOG000000023679 | PR/SET domain 5(Prdm5)                                                                | -0.768 |
| Muscle | ENSRNOG000000025539 | vacuolar protein sorting 13A(Vps13a)                                                  | 0.631  |
| Muscle | ENSRNOG000000058068 | obscurin, cytoskeletal calmodulin and titin-interacting RhoGEF(Obscn)                 | 0.672  |
| Spleen | ENSRNOG00000011278  | serine/threonine kinase 3(Stk3)                                                       | 0.654  |
| Spleen | ENSRNOG00000013368  | phospholipase C-like 2(Plc12)                                                         | -0.625 |
| Spleen | ENSRNOG000000045605 | UDP-glucuronate decarboxylase 1(Uxs1)                                                 | 0.684  |
| Thymus | ENSRNOG000000000443 | complement C4-like(LOC103689965)                                                      | 0.769  |
| Thymus | ENSRNOG000000002983 | nuclear factor 1 X(Nf1x)                                                              | 0.917  |
| Thymus | ENSRNOG000000003296 | deoxycytidine kinase(Dck)                                                             | -0.612 |
| Thymus | ENSRNOG000000005391 | phosphatidylinositol-3,4,5-trisphosphate-dependent Rac exchange factor 2(Prex2)       | 0.609  |
| Thymus | ENSRNOG000000005776 | B-cell CLL/lymphoma 11B(Bcl11b)                                                       | -0.606 |
| Thymus | ENSRNOG00000010210  | solute carrier family 7 member 11(Slc7a11)                                            | -0.766 |
| Thymus | ENSRNOG00000010827  | polypyrimidine tract binding protein 2(Ptbp2)                                         | -0.626 |
| Thymus | ENSRNOG00000013598  | maternal embryonic leucine zipper kinase(Melk)                                        | -0.613 |
| Thymus | ENSRNOG00000013615  | DNA nucleotidylexotransferase(Dntt)                                                   | -0.603 |
| Thymus | ENSRNOG00000013884  | pleckstrin and Sec7 domain containing 3(Psd3)                                         | 0.829  |
| Thymus | ENSRNOG00000015519  | carboxylesterase 1D(Ces1d)                                                            | 0.808  |
| Thymus | ENSRNOG00000016924  | ATP citrate lyase(Acly)                                                               | 0.683  |
| Thymus | ENSRNOG00000017803  | amyloid beta precursor protein binding family B member 1 interacting protein(Apbb1ip) | -0.627 |
| Thymus | ENSRNOG000000028422 | required for meiotic nuclear division 5 homolog A(Rmnd5a)                             | -0.620 |
| Thymus | ENSRNOG000000034013 | acetyl-CoA carboxylase alpha(Acaca)                                                   | 0.938  |
| Thymus | ENSRNOG000000045636 | fatty acid synthase(Fasn)                                                             | 0.718  |
| Thymus | ENSRNOG000000055631 | zinc finger protein 280D(Zfp280d)                                                     | -0.627 |
| Uterus | ENSRNOG000000000277 | tet methylcytosine dioxygenase 1(Tet1)                                                | -0.615 |
| Uterus | ENSRNOG000000000942 | PAN3 poly(A) specific ribonuclease subunit(Pan3)                                      | 0.800  |
| Uterus | ENSRNOG000000002093 | transforming growth factor beta receptor 3(Tgfb3)                                     | 0.661  |
| Uterus | ENSRNOG000000003357 | collagen type III alpha 1 chain(Col3a1)                                               | -0.667 |
| Uterus | ENSRNOG000000004036 | sorting nexin 12(Snx12)                                                               | 0.781  |
| Uterus | ENSRNOG000000004444 | IKAROS family zinc finger 1(Ikzf1)                                                    | 0.646  |
| Uterus | ENSRNOG000000004571 | similar to CDNA sequence BC052040(RGD1563680)                                         | -0.760 |
| Uterus | ENSRNOG000000005191 | tripartite motif-containing 44(Trim44)                                                | -0.640 |

| Tissue | Ensembl ID         | Gene name                                                            | $\rho$ |
|--------|--------------------|----------------------------------------------------------------------|--------|
| Uterus | ENSRNOG00000005291 | solute carrier family 38, member 1(Slc38a1)                          | 0.704  |
| Uterus | ENSRNOG00000005434 | spectrin, beta, non-erythrocytic 1(Sptbn1)                           | 0.640  |
| Uterus | ENSRNOG00000006553 | basonuclin 2(Bnc2)                                                   | 0.714  |
| Uterus | ENSRNOG00000006905 | HECT domain E3 ubiquitin protein ligase 1(Hectd1)                    | 0.647  |
| Uterus | ENSRNOG00000007127 | Bardet-Biedl syndrome 5(Bbs5)                                        | 0.759  |
| Uterus | ENSRNOG00000008709 | Rho GTPase activating protein 32(Arhgap32)                           | -0.764 |
| Uterus | ENSRNOG00000009690 | ring finger protein 219(Rnf219)                                      | 0.613  |
| Uterus | ENSRNOG00000009836 | RNA binding motif protein 26(Rbm26)                                  | 0.765  |
| Uterus | ENSRNOG00000011584 | G patch domain containing 1(Gpatch1)                                 | 0.640  |
| Uterus | ENSRNOG00000012021 | catenin, beta like 1(Ctnnb1)                                         | 0.640  |
| Uterus | ENSRNOG00000012271 | CCR4-NOT transcription complex, subunit 1(Cnot1)                     | 0.629  |
| Uterus | ENSRNOG00000012698 | chondroitin sulfate synthase 1(Chsy1)                                | 0.706  |
| Uterus | ENSRNOG00000013089 | kinesin family member 13B(Kif13b)                                    | 0.708  |
| Uterus | ENSRNOG00000013844 | family with sequence similarity 172, member A(Fam172a)               | 0.629  |
| Uterus | ENSRNOG00000013884 | pleckstrin and Sec7 domain containing 3(Psd3)                        | -0.655 |
| Uterus | ENSRNOG00000015813 | ubiquitin protein ligase E3 component n-recognin 2(Ubr2)             | 0.693  |
| Uterus | ENSRNOG00000015843 | integrin alpha FG-GAP repeat containing 1(Itfg1)                     | 0.661  |
| Uterus | ENSRNOG00000017758 | similar to NICE-3(LOC361985)                                         | 0.608  |
| Uterus | ENSRNOG00000019005 | phosphodiesterase 8A(Pde8a)                                          | 0.663  |
| Uterus | ENSRNOG00000019090 | chaperonin containing TCP1 subunit 3(Cct3)                           | 0.634  |
| Uterus | ENSRNOG00000019333 | homeodomain interacting protein kinase 1(Hipk1)                      | 0.640  |
| Uterus | ENSRNOG00000019577 | ADAM metallopeptidase with thrombospondin type 1 motif, 19(Adamts19) | -0.661 |
| Uterus | ENSRNOG00000019948 | PHD finger protein 20(Phf20)                                         | -0.682 |
| Uterus | ENSRNOG00000020848 | coenzyme Q8B(Coq8b)                                                  | 0.693  |
| Uterus | ENSRNOG00000024482 | trinucleotide repeat containing 18(Tnrc18)                           | 0.613  |
| Uterus | ENSRNOG00000027249 | Fanconi anemia, complementation group L(Fancl)                       | 0.640  |
| Uterus | ENSRNOG00000037227 | YES proto-oncogene 1, Src family tyrosine kinase(Yes1)               | 0.676  |
| Uterus | ENSRNOG00000045605 | UDP-glucuronate decarboxylase 1(Uxs1)                                | 0.703  |
| Uterus | ENSRNOG00000047014 | homer scaffolding protein 1(Homer1)                                  | 0.611  |
| Uterus | ENSRNOG00000054294 | regulation of nuclear pre-mRNA domain containing 2(Rprd2)            | 0.629  |
| Uterus | ENSRNOG00000054890 | filamin A(Flna)                                                      | 0.604  |
| Uterus | ENSRNOG00000057880 | myosin heavy chain 11(Myh11)                                         | 0.788  |

Note – The  $\rho$  values were calculated with *Spearman's* rank correlation test. Only the circRNAs with  $|\rho| > 0.6$  were listed.

**Supplementary Table S4. The details of the 320 tissue samples in the rat BodyMap dataset.**

| Sample      | Tissue  | Age (Week) | Sex | Replicate | Total reads |
|-------------|---------|------------|-----|-----------|-------------|
| Adr_F_002_1 | Adrenal | 2          | F   | 1         | 32,893,912  |
| Adr_F_002_2 | Adrenal | 2          | F   | 2         | 34,216,259  |
| Adr_F_002_3 | Adrenal | 2          | F   | 3         | 40,353,070  |
| Adr_F_002_4 | Adrenal | 2          | F   | 4         | 38,142,330  |
| Adr_F_006_1 | Adrenal | 6          | F   | 1         | 42,169,397  |
| Adr_F_006_2 | Adrenal | 6          | F   | 2         | 41,031,429  |
| Adr_F_006_3 | Adrenal | 6          | F   | 3         | 42,537,053  |
| Adr_F_006_4 | Adrenal | 6          | F   | 4         | 40,723,528  |
| Adr_F_021_1 | Adrenal | 21         | F   | 1         | 56,640,235  |
| Adr_F_021_2 | Adrenal | 21         | F   | 2         | 63,167,739  |
| Adr_F_021_3 | Adrenal | 21         | F   | 3         | 33,336,402  |
| Adr_F_021_4 | Adrenal | 21         | F   | 4         | 49,973,385  |
| Adr_F_104_1 | Adrenal | 104        | F   | 1         | 50,959,286  |
| Adr_F_104_2 | Adrenal | 104        | F   | 2         | 39,499,844  |
| Adr_F_104_3 | Adrenal | 104        | F   | 3         | 30,406,326  |
| Adr_F_104_4 | Adrenal | 104        | F   | 4         | 44,512,172  |
| Adr_M_002_1 | Adrenal | 2          | M   | 1         | 43,217,205  |
| Adr_M_002_2 | Adrenal | 2          | M   | 2         | 34,086,099  |
| Adr_M_002_3 | Adrenal | 2          | M   | 3         | 54,623,694  |
| Adr_M_002_4 | Adrenal | 2          | M   | 4         | 58,382,411  |
| Adr_M_006_1 | Adrenal | 6          | M   | 1         | 47,795,886  |
| Adr_M_006_2 | Adrenal | 6          | M   | 2         | 39,095,817  |
| Adr_M_006_3 | Adrenal | 6          | M   | 3         | 58,990,226  |
| Adr_M_006_4 | Adrenal | 6          | M   | 4         | 58,471,533  |
| Adr_M_021_1 | Adrenal | 21         | M   | 1         | 38,592,942  |
| Adr_M_021_2 | Adrenal | 21         | M   | 2         | 42,966,993  |
| Adr_M_021_3 | Adrenal | 21         | M   | 3         | 53,013,485  |
| Adr_M_021_4 | Adrenal | 21         | M   | 4         | 40,308,635  |
| Adr_M_104_1 | Adrenal | 104        | M   | 1         | 34,273,669  |
| Adr_M_104_2 | Adrenal | 104        | M   | 2         | 57,005,782  |
| Adr_M_104_3 | Adrenal | 104        | M   | 3         | 28,975,806  |
| Adr_M_104_4 | Adrenal | 104        | M   | 4         | 33,413,724  |
| Brn_F_002_1 | Brain   | 2          | F   | 1         | 40,243,776  |
| Brn_F_002_2 | Brain   | 2          | F   | 2         | 55,894,697  |
| Brn_F_002_3 | Brain   | 2          | F   | 3         | 52,132,882  |
| Brn_F_002_4 | Brain   | 2          | F   | 4         | 46,304,026  |
| Brn_F_006_1 | Brain   | 6          | F   | 1         | 36,770,720  |
| Brn_F_006_2 | Brain   | 6          | F   | 2         | 40,981,364  |
| Brn_F_006_3 | Brain   | 6          | F   | 3         | 42,839,368  |
| Brn_F_006_4 | Brain   | 6          | F   | 4         | 45,933,093  |
| Brn_F_021_1 | Brain   | 21         | F   | 1         | 30,816,305  |
| Brn_F_021_2 | Brain   | 21         | F   | 2         | 56,085,643  |

| Sample      | Tissue | Age (Week) | Sex | Replicate | Total reads |
|-------------|--------|------------|-----|-----------|-------------|
| Brn_F_021_3 | Brain  | 21         | F   | 3         | 37,425,957  |
| Brn_F_021_4 | Brain  | 21         | F   | 4         | 30,959,602  |
| Brn_F_104_1 | Brain  | 104        | F   | 1         | 56,057,901  |
| Brn_F_104_2 | Brain  | 104        | F   | 2         | 47,681,218  |
| Brn_F_104_3 | Brain  | 104        | F   | 3         | 65,666,976  |
| Brn_F_104_4 | Brain  | 104        | F   | 4         | 66,613,288  |
| Brn_M_002_1 | Brain  | 2          | M   | 1         | 29,965,640  |
| Brn_M_002_2 | Brain  | 2          | M   | 2         | 51,323,751  |
| Brn_M_002_3 | Brain  | 2          | M   | 3         | 57,541,039  |
| Brn_M_002_4 | Brain  | 2          | M   | 4         | 33,250,363  |
| Brn_M_006_1 | Brain  | 6          | M   | 1         | 45,953,040  |
| Brn_M_006_2 | Brain  | 6          | M   | 2         | 56,030,679  |
| Brn_M_006_3 | Brain  | 6          | M   | 3         | 35,332,949  |
| Brn_M_006_4 | Brain  | 6          | M   | 4         | 35,757,661  |
| Brn_M_021_1 | Brain  | 21         | M   | 1         | 46,611,957  |
| Brn_M_021_2 | Brain  | 21         | M   | 2         | 33,650,904  |
| Brn_M_021_3 | Brain  | 21         | M   | 3         | 39,897,816  |
| Brn_M_021_4 | Brain  | 21         | M   | 4         | 34,318,172  |
| Brn_M_104_1 | Brain  | 104        | M   | 1         | 45,048,861  |
| Brn_M_104_2 | Brain  | 104        | M   | 2         | 36,847,461  |
| Brn_M_104_3 | Brain  | 104        | M   | 3         | 34,192,975  |
| Brn_M_104_4 | Brain  | 104        | M   | 4         | 40,326,338  |
| Hrt_F_002_1 | Heart  | 2          | F   | 1         | 71,753,459  |
| Hrt_F_002_2 | Heart  | 2          | F   | 2         | 34,698,255  |
| Hrt_F_002_3 | Heart  | 2          | F   | 3         | 53,175,352  |
| Hrt_F_002_4 | Heart  | 2          | F   | 4         | 41,243,912  |
| Hrt_F_006_1 | Heart  | 6          | F   | 1         | 52,332,678  |
| Hrt_F_006_2 | Heart  | 6          | F   | 2         | 42,882,028  |
| Hrt_F_006_3 | Heart  | 6          | F   | 3         | 62,408,439  |
| Hrt_F_006_4 | Heart  | 6          | F   | 4         | 51,750,887  |
| Hrt_F_021_1 | Heart  | 21         | F   | 1         | 38,346,452  |
| Hrt_F_021_2 | Heart  | 21         | F   | 2         | 45,833,002  |
| Hrt_F_021_3 | Heart  | 21         | F   | 3         | 33,774,162  |
| Hrt_F_021_4 | Heart  | 21         | F   | 4         | 49,682,374  |
| Hrt_F_104_1 | Heart  | 104        | F   | 1         | 51,186,027  |
| Hrt_F_104_2 | Heart  | 104        | F   | 2         | 36,461,517  |
| Hrt_F_104_3 | Heart  | 104        | F   | 3         | 42,692,898  |
| Hrt_F_104_4 | Heart  | 104        | F   | 4         | 43,540,195  |
| Hrt_M_002_1 | Heart  | 2          | M   | 1         | 53,390,578  |
| Hrt_M_002_2 | Heart  | 2          | M   | 2         | 60,430,937  |
| Hrt_M_002_3 | Heart  | 2          | M   | 3         | 49,064,469  |
| Hrt_M_002_4 | Heart  | 2          | M   | 4         | 51,566,182  |
| Hrt_M_006_1 | Heart  | 6          | M   | 1         | 57,904,914  |

| Sample      | Tissue | Age (Week) | Sex | Replicate | Total reads |
|-------------|--------|------------|-----|-----------|-------------|
| Hrt_M_006_2 | Heart  | 6          | M   | 2         | 36,396,595  |
| Hrt_M_006_3 | Heart  | 6          | M   | 3         | 39,431,813  |
| Hrt_M_006_4 | Heart  | 6          | M   | 4         | 48,413,209  |
| Hrt_M_021_1 | Heart  | 21         | M   | 1         | 56,776,103  |
| Hrt_M_021_2 | Heart  | 21         | M   | 2         | 39,049,562  |
| Hrt_M_021_3 | Heart  | 21         | M   | 3         | 52,427,869  |
| Hrt_M_021_4 | Heart  | 21         | M   | 4         | 57,888,428  |
| Hrt_M_104_1 | Heart  | 104        | M   | 1         | 54,938,916  |
| Hrt_M_104_2 | Heart  | 104        | M   | 2         | 40,866,129  |
| Hrt_M_104_3 | Heart  | 104        | M   | 3         | 39,569,732  |
| Hrt_M_104_4 | Heart  | 104        | M   | 4         | 51,692,814  |
| Kdn_F_002_1 | Kidney | 2          | F   | 1         | 53,808,204  |
| Kdn_F_002_2 | Kidney | 2          | F   | 2         | 33,119,938  |
| Kdn_F_002_3 | Kidney | 2          | F   | 3         | 41,484,642  |
| Kdn_F_002_4 | Kidney | 2          | F   | 4         | 51,461,396  |
| Kdn_F_006_1 | Kidney | 6          | F   | 1         | 39,090,168  |
| Kdn_F_006_2 | Kidney | 6          | F   | 2         | 43,344,456  |
| Kdn_F_006_3 | Kidney | 6          | F   | 3         | 44,729,763  |
| Kdn_F_006_4 | Kidney | 6          | F   | 4         | 46,056,348  |
| Kdn_F_021_1 | Kidney | 21         | F   | 1         | 56,071,180  |
| Kdn_F_021_2 | Kidney | 21         | F   | 2         | 46,382,154  |
| Kdn_F_021_3 | Kidney | 21         | F   | 3         | 43,488,475  |
| Kdn_F_021_4 | Kidney | 21         | F   | 4         | 48,089,114  |
| Kdn_F_104_1 | Kidney | 104        | F   | 1         | 42,324,958  |
| Kdn_F_104_2 | Kidney | 104        | F   | 2         | 39,783,536  |
| Kdn_F_104_3 | Kidney | 104        | F   | 3         | 53,702,805  |
| Kdn_F_104_4 | Kidney | 104        | F   | 4         | 46,123,420  |
| Kdn_M_002_1 | Kidney | 2          | M   | 1         | 48,304,048  |
| Kdn_M_002_2 | Kidney | 2          | M   | 2         | 43,849,613  |
| Kdn_M_002_3 | Kidney | 2          | M   | 3         | 48,712,708  |
| Kdn_M_002_4 | Kidney | 2          | M   | 4         | 50,088,874  |
| Kdn_M_006_1 | Kidney | 6          | M   | 1         | 41,358,648  |
| Kdn_M_006_2 | Kidney | 6          | M   | 2         | 28,757,350  |
| Kdn_M_006_3 | Kidney | 6          | M   | 3         | 60,615,179  |
| Kdn_M_006_4 | Kidney | 6          | M   | 4         | 41,410,588  |
| Kdn_M_021_1 | Kidney | 21         | M   | 1         | 53,656,853  |
| Kdn_M_021_2 | Kidney | 21         | M   | 2         | 44,502,793  |
| Kdn_M_021_3 | Kidney | 21         | M   | 3         | 40,315,290  |
| Kdn_M_021_4 | Kidney | 21         | M   | 4         | 29,696,035  |
| Kdn_M_104_1 | Kidney | 104        | M   | 1         | 56,835,940  |
| Kdn_M_104_2 | Kidney | 104        | M   | 2         | 97,864,638  |
| Kdn_M_104_3 | Kidney | 104        | M   | 3         | 81,728,379  |
| Kdn_M_104_4 | Kidney | 104        | M   | 4         | 42,669,039  |

| Sample      | Tissue | Age (Week) | Sex | Replicate | Total reads |
|-------------|--------|------------|-----|-----------|-------------|
| Lng_F_002_1 | Lung   | 2          | F   | 1         | 41,533,777  |
| Lng_F_002_2 | Lung   | 2          | F   | 2         | 48,734,095  |
| Lng_F_002_3 | Lung   | 2          | F   | 3         | 59,169,326  |
| Lng_F_002_4 | Lung   | 2          | F   | 4         | 45,759,427  |
| Lng_F_006_1 | Lung   | 6          | F   | 1         | 53,581,814  |
| Lng_F_006_2 | Lung   | 6          | F   | 2         | 48,929,259  |
| Lng_F_006_3 | Lung   | 6          | F   | 3         | 33,453,734  |
| Lng_F_006_4 | Lung   | 6          | F   | 4         | 45,199,683  |
| Lng_F_021_1 | Lung   | 21         | F   | 1         | 29,182,773  |
| Lng_F_021_2 | Lung   | 21         | F   | 2         | 43,787,060  |
| Lng_F_021_3 | Lung   | 21         | F   | 3         | 47,325,414  |
| Lng_F_021_4 | Lung   | 21         | F   | 4         | 35,174,628  |
| Lng_F_104_1 | Lung   | 104        | F   | 1         | 56,676,755  |
| Lng_F_104_2 | Lung   | 104        | F   | 2         | 41,016,566  |
| Lng_F_104_3 | Lung   | 104        | F   | 3         | 49,746,103  |
| Lng_F_104_4 | Lung   | 104        | F   | 4         | 34,166,377  |
| Lng_M_002_1 | Lung   | 2          | M   | 1         | 54,965,678  |
| Lng_M_002_2 | Lung   | 2          | M   | 2         | 58,298,002  |
| Lng_M_002_3 | Lung   | 2          | M   | 3         | 47,729,582  |
| Lng_M_002_4 | Lung   | 2          | M   | 4         | 58,186,350  |
| Lng_M_006_1 | Lung   | 6          | M   | 1         | 39,525,551  |
| Lng_M_006_2 | Lung   | 6          | M   | 2         | 31,598,157  |
| Lng_M_006_3 | Lung   | 6          | M   | 3         | 39,539,858  |
| Lng_M_006_4 | Lung   | 6          | M   | 4         | 49,071,000  |
| Lng_M_021_1 | Lung   | 21         | M   | 1         | 52,187,172  |
| Lng_M_021_2 | Lung   | 21         | M   | 2         | 34,437,880  |
| Lng_M_021_3 | Lung   | 21         | M   | 3         | 32,943,175  |
| Lng_M_021_4 | Lung   | 21         | M   | 4         | 28,550,513  |
| Lng_M_104_1 | Lung   | 104        | M   | 1         | 55,493,841  |
| Lng_M_104_2 | Lung   | 104        | M   | 2         | 37,826,341  |
| Lng_M_104_3 | Lung   | 104        | M   | 3         | 47,621,755  |
| Lng_M_104_4 | Lung   | 104        | M   | 4         | 50,924,647  |
| Lvr_F_002_1 | Liver  | 2          | F   | 1         | 33,947,155  |
| Lvr_F_002_2 | Liver  | 2          | F   | 2         | 25,725,181  |
| Lvr_F_002_3 | Liver  | 2          | F   | 3         | 24,771,704  |
| Lvr_F_002_4 | Liver  | 2          | F   | 4         | 43,551,385  |
| Lvr_F_006_1 | Liver  | 6          | F   | 1         | 28,171,973  |
| Lvr_F_006_2 | Liver  | 6          | F   | 2         | 33,376,474  |
| Lvr_F_006_3 | Liver  | 6          | F   | 3         | 35,287,971  |
| Lvr_F_006_4 | Liver  | 6          | F   | 4         | 30,726,120  |
| Lvr_F_021_1 | Liver  | 21         | F   | 1         | 28,475,954  |
| Lvr_F_021_2 | Liver  | 21         | F   | 2         | 26,196,053  |
| Lvr_F_021_3 | Liver  | 21         | F   | 3         | 33,018,173  |



| Sample      | Tissue | Age (Week) | Sex | Replicate | Total reads |
|-------------|--------|------------|-----|-----------|-------------|
| Lvr_F_021_4 | Liver  | 21         | F   | 4         | 30,023,883  |
| Lvr_F_104_1 | Liver  | 104        | F   | 1         | 35,099,606  |
| Lvr_F_104_2 | Liver  | 104        | F   | 2         | 32,578,204  |
| Lvr_F_104_3 | Liver  | 104        | F   | 3         | 18,614,381  |
| Lvr_F_104_4 | Liver  | 104        | F   | 4         | 16,172,219  |
| Lvr_M_002_1 | Liver  | 2          | M   | 1         | 27,999,674  |
| Lvr_M_002_2 | Liver  | 2          | M   | 2         | 22,925,861  |
| Lvr_M_002_3 | Liver  | 2          | M   | 3         | 24,667,720  |
| Lvr_M_002_4 | Liver  | 2          | M   | 4         | 23,233,275  |
| Lvr_M_006_1 | Liver  | 6          | M   | 1         | 26,738,812  |
| Lvr_M_006_2 | Liver  | 6          | M   | 2         | 28,827,872  |
| Lvr_M_006_3 | Liver  | 6          | M   | 3         | 26,486,982  |
| Lvr_M_006_4 | Liver  | 6          | M   | 4         | 27,752,424  |
| Lvr_M_021_1 | Liver  | 21         | M   | 1         | 16,038,547  |
| Lvr_M_021_2 | Liver  | 21         | M   | 2         | 30,524,885  |
| Lvr_M_021_3 | Liver  | 21         | M   | 3         | 23,910,727  |
| Lvr_M_021_4 | Liver  | 21         | M   | 4         | 29,952,853  |
| Lvr_M_104_1 | Liver  | 104        | M   | 1         | 35,494,631  |
| Lvr_M_104_2 | Liver  | 104        | M   | 2         | 35,267,042  |
| Lvr_M_104_3 | Liver  | 104        | M   | 3         | 61,371,908  |
| Lvr_M_104_4 | Liver  | 104        | M   | 4         | 26,310,530  |
| Msc_F_002_1 | Muscle | 2          | F   | 1         | 41,071,320  |
| Msc_F_002_2 | Muscle | 2          | F   | 2         | 37,413,515  |
| Msc_F_002_3 | Muscle | 2          | F   | 3         | 37,549,646  |
| Msc_F_002_4 | Muscle | 2          | F   | 4         | 35,734,639  |
| Msc_F_006_1 | Muscle | 6          | F   | 1         | 28,431,285  |
| Msc_F_006_2 | Muscle | 6          | F   | 2         | 38,390,341  |
| Msc_F_006_3 | Muscle | 6          | F   | 3         | 61,926,744  |
| Msc_F_006_4 | Muscle | 6          | F   | 4         | 33,288,649  |
| Msc_F_021_1 | Muscle | 21         | F   | 1         | 23,079,460  |
| Msc_F_021_2 | Muscle | 21         | F   | 2         | 38,154,547  |
| Msc_F_021_3 | Muscle | 21         | F   | 3         | 33,688,569  |
| Msc_F_021_4 | Muscle | 21         | F   | 4         | 40,196,665  |
| Msc_F_104_1 | Muscle | 104        | F   | 1         | 37,432,419  |
| Msc_F_104_2 | Muscle | 104        | F   | 2         | 26,640,934  |
| Msc_F_104_3 | Muscle | 104        | F   | 3         | 29,905,201  |
| Msc_F_104_4 | Muscle | 104        | F   | 4         | 30,607,466  |
| Msc_M_002_1 | Muscle | 2          | M   | 1         | 36,763,639  |
| Msc_M_002_2 | Muscle | 2          | M   | 2         | 36,003,073  |
| Msc_M_002_3 | Muscle | 2          | M   | 3         | 29,338,941  |
| Msc_M_002_4 | Muscle | 2          | M   | 4         | 31,964,949  |
| Msc_M_006_1 | Muscle | 6          | M   | 1         | 31,221,239  |
| Msc_M_006_2 | Muscle | 6          | M   | 2         | 28,417,024  |

| Sample      | Tissue | Age (Week) | Sex | Replicate | Total reads |
|-------------|--------|------------|-----|-----------|-------------|
| Msc_M_006_3 | Muscle | 6          | M   | 3         | 24,777,202  |
| Msc_M_006_4 | Muscle | 6          | M   | 4         | 29,533,569  |
| Msc_M_021_1 | Muscle | 21         | M   | 1         | 55,840,635  |
| Msc_M_021_2 | Muscle | 21         | M   | 2         | 17,605,900  |
| Msc_M_021_3 | Muscle | 21         | M   | 3         | 30,123,611  |
| Msc_M_021_4 | Muscle | 21         | M   | 4         | 38,741,769  |
| Msc_M_104_1 | Muscle | 104        | M   | 1         | 33,021,047  |
| Msc_M_104_2 | Muscle | 104        | M   | 2         | 36,019,219  |
| Msc_M_104_3 | Muscle | 104        | M   | 3         | 31,353,357  |
| Msc_M_104_4 | Muscle | 104        | M   | 4         | 33,944,508  |
| Spl_F_002_1 | Spleen | 2          | F   | 1         | 28,716,189  |
| Spl_F_002_2 | Spleen | 2          | F   | 2         | 36,351,486  |
| Spl_F_002_3 | Spleen | 2          | F   | 3         | 34,258,486  |
| Spl_F_002_4 | Spleen | 2          | F   | 4         | 51,789,784  |
| Spl_F_006_1 | Spleen | 6          | F   | 1         | 54,045,434  |
| Spl_F_006_2 | Spleen | 6          | F   | 2         | 34,309,675  |
| Spl_F_006_3 | Spleen | 6          | F   | 3         | 38,556,135  |
| Spl_F_006_4 | Spleen | 6          | F   | 4         | 30,184,705  |
| Spl_F_021_1 | Spleen | 21         | F   | 1         | 31,082,131  |
| Spl_F_021_2 | Spleen | 21         | F   | 2         | 34,503,656  |
| Spl_F_021_3 | Spleen | 21         | F   | 3         | 29,582,856  |
| Spl_F_021_4 | Spleen | 21         | F   | 4         | 41,256,125  |
| Spl_F_104_1 | Spleen | 104        | F   | 1         | 37,500,858  |
| Spl_F_104_2 | Spleen | 104        | F   | 2         | 32,488,876  |
| Spl_F_104_3 | Spleen | 104        | F   | 3         | 39,118,194  |
| Spl_F_104_4 | Spleen | 104        | F   | 4         | 54,073,009  |
| Spl_M_002_1 | Spleen | 2          | M   | 1         | 38,111,982  |
| Spl_M_002_2 | Spleen | 2          | M   | 2         | 36,314,374  |
| Spl_M_002_3 | Spleen | 2          | M   | 3         | 40,490,649  |
| Spl_M_002_4 | Spleen | 2          | M   | 4         | 43,238,620  |
| Spl_M_006_1 | Spleen | 6          | M   | 1         | 41,280,233  |
| Spl_M_006_2 | Spleen | 6          | M   | 2         | 30,639,331  |
| Spl_M_006_3 | Spleen | 6          | M   | 3         | 43,923,217  |
| Spl_M_006_4 | Spleen | 6          | M   | 4         | 38,245,067  |
| Spl_M_021_1 | Spleen | 21         | M   | 1         | 32,298,070  |
| Spl_M_021_2 | Spleen | 21         | M   | 2         | 31,581,261  |
| Spl_M_021_3 | Spleen | 21         | M   | 3         | 54,567,455  |
| Spl_M_021_4 | Spleen | 21         | M   | 4         | 52,645,185  |
| Spl_M_104_1 | Spleen | 104        | M   | 1         | 37,498,789  |
| Spl_M_104_2 | Spleen | 104        | M   | 2         | 42,657,126  |
| Spl_M_104_3 | Spleen | 104        | M   | 3         | 33,966,572  |
| Spl_M_104_4 | Spleen | 104        | M   | 4         | 40,754,322  |
| Thm_F_002_1 | Thymus | 2          | F   | 1         | 46,133,374  |

| Sample      | Tissue | Age (Week) | Sex | Replicate | Total reads |
|-------------|--------|------------|-----|-----------|-------------|
| Thm_F_002_2 | Thymus | 2          | F   | 2         | 36,796,576  |
| Thm_F_002_3 | Thymus | 2          | F   | 3         | 45,511,776  |
| Thm_F_002_4 | Thymus | 2          | F   | 4         | 31,002,656  |
| Thm_F_006_1 | Thymus | 6          | F   | 1         | 32,829,354  |
| Thm_F_006_2 | Thymus | 6          | F   | 2         | 39,658,155  |
| Thm_F_006_3 | Thymus | 6          | F   | 3         | 31,322,541  |
| Thm_F_006_4 | Thymus | 6          | F   | 4         | 33,327,997  |
| Thm_F_021_1 | Thymus | 21         | F   | 1         | 49,721,098  |
| Thm_F_021_2 | Thymus | 21         | F   | 2         | 36,924,211  |
| Thm_F_021_3 | Thymus | 21         | F   | 3         | 34,288,623  |
| Thm_F_021_4 | Thymus | 21         | F   | 4         | 35,435,648  |
| Thm_F_104_1 | Thymus | 104        | F   | 1         | 41,321,268  |
| Thm_F_104_2 | Thymus | 104        | F   | 2         | 31,468,357  |
| Thm_F_104_3 | Thymus | 104        | F   | 3         | 50,756,861  |
| Thm_F_104_4 | Thymus | 104        | F   | 4         | 50,994,147  |
| Thm_M_002_1 | Thymus | 2          | M   | 1         | 44,737,308  |
| Thm_M_002_2 | Thymus | 2          | M   | 2         | 39,654,834  |
| Thm_M_002_3 | Thymus | 2          | M   | 3         | 28,234,075  |
| Thm_M_002_4 | Thymus | 2          | M   | 4         | 40,710,541  |
| Thm_M_006_1 | Thymus | 6          | M   | 1         | 37,565,504  |
| Thm_M_006_2 | Thymus | 6          | M   | 2         | 50,467,811  |
| Thm_M_006_3 | Thymus | 6          | M   | 3         | 62,668,840  |
| Thm_M_006_4 | Thymus | 6          | M   | 4         | 40,138,219  |
| Thm_M_021_1 | Thymus | 21         | M   | 1         | 30,419,204  |
| Thm_M_021_2 | Thymus | 21         | M   | 2         | 28,449,225  |
| Thm_M_021_3 | Thymus | 21         | M   | 3         | 40,419,495  |
| Thm_M_021_4 | Thymus | 21         | M   | 4         | 35,969,269  |
| Thm_M_104_1 | Thymus | 104        | M   | 1         | 50,067,621  |
| Thm_M_104_2 | Thymus | 104        | M   | 2         | 46,400,550  |
| Thm_M_104_3 | Thymus | 104        | M   | 3         | 58,411,261  |
| Thm_M_104_4 | Thymus | 104        | M   | 4         | 30,266,828  |
| Tst_M_002_1 | Testes | 2          | M   | 1         | 38,786,378  |
| Tst_M_002_2 | Testes | 2          | M   | 2         | 46,510,409  |
| Tst_M_002_3 | Testes | 2          | M   | 3         | 55,939,035  |
| Tst_M_002_4 | Testes | 2          | M   | 4         | 40,535,357  |
| Tst_M_006_1 | Testes | 6          | M   | 1         | 32,451,684  |
| Tst_M_006_2 | Testes | 6          | M   | 2         | 34,489,765  |
| Tst_M_006_3 | Testes | 6          | M   | 3         | 64,845,426  |
| Tst_M_006_4 | Testes | 6          | M   | 4         | 45,280,342  |
| Tst_M_021_1 | Testes | 21         | M   | 1         | 44,266,539  |
| Tst_M_021_2 | Testes | 21         | M   | 2         | 43,885,804  |
| Tst_M_021_3 | Testes | 21         | M   | 3         | 53,823,609  |
| Tst_M_021_4 | Testes | 21         | M   | 4         | 48,442,971  |

| <b>Sample</b> | <b>Tissue</b> | <b>Age (Week)</b> | <b>Sex</b> | <b>Replicate</b> | <b>Total reads</b> |
|---------------|---------------|-------------------|------------|------------------|--------------------|
| Tst_M_104_1   | Testes        | 104               | M          | 1                | 39,935,182         |
| Tst_M_104_2   | Testes        | 104               | M          | 2                | 37,170,564         |
| Tst_M_104_3   | Testes        | 104               | M          | 3                | 44,451,678         |
| Tst_M_104_4   | Testes        | 104               | M          | 4                | 52,471,109         |
| Utr_F_002_1   | Uterus        | 2                 | F          | 1                | 39,126,625         |
| Utr_F_002_2   | Uterus        | 2                 | F          | 2                | 33,956,066         |
| Utr_F_002_3   | Uterus        | 2                 | F          | 3                | 31,442,276         |
| Utr_F_002_4   | Uterus        | 2                 | F          | 4                | 42,833,061         |
| Utr_F_006_1   | Uterus        | 6                 | F          | 1                | 51,709,494         |
| Utr_F_006_2   | Uterus        | 6                 | F          | 2                | 48,933,982         |
| Utr_F_006_3   | Uterus        | 6                 | F          | 3                | 54,316,703         |
| Utr_F_006_4   | Uterus        | 6                 | F          | 4                | 36,371,273         |
| Utr_F_021_1   | Uterus        | 21                | F          | 1                | 28,031,893         |
| Utr_F_021_2   | Uterus        | 21                | F          | 2                | 56,435,414         |
| Utr_F_021_3   | Uterus        | 21                | F          | 3                | 64,490,643         |
| Utr_F_021_4   | Uterus        | 21                | F          | 4                | 49,674,463         |
| Utr_F_104_1   | Uterus        | 104               | F          | 1                | 43,791,901         |
| Utr_F_104_2   | Uterus        | 104               | F          | 2                | 42,885,150         |
| Utr_F_104_3   | Uterus        | 104               | F          | 3                | 54,397,342         |
| Utr_F_104_4   | Uterus        | 104               | F          | 4                | 45,878,141         |
